1 **Human organ chip-enabled pipeline to rapidly repurpose therapeutics**  
2 **during viral pandemics**

3 Longlong Si<sup>1#</sup>, Haiqing Bai<sup>1#</sup>, Melissa Rodas<sup>1</sup>, Wuji Cao<sup>1</sup>, Crystal Yuri Oh<sup>1</sup>, Amanda  
4 Jiang<sup>3</sup>, Rasmus Moller<sup>4</sup>, Daisy Hoagland<sup>4</sup>, Kohei Oishi<sup>4</sup>, Shu Horiuchi<sup>4</sup>, Skyler Uhl<sup>4</sup>,  
5 Daniel Blanco-Melo<sup>4</sup>, Randy A. Albrecht<sup>4,5</sup>, Wen-Chun Liu<sup>4,5</sup>, Tristan Jordan<sup>4</sup>, Benjamin  
6 E. Nilsson-Payant<sup>4</sup>, James Logue<sup>6</sup>, Robert Haupt<sup>6</sup>, Marisa McGrath<sup>6</sup>, Stuart Weston<sup>6</sup>,  
7 Atiq Nurani<sup>1</sup>, Seong Min Kim<sup>1</sup>, Danni Y. Zhu<sup>1</sup>, Kambez H. Benam<sup>1,+</sup>, Girija Goyal<sup>1</sup>,  
8 Sarah E. Gilpin<sup>1</sup>, Rachelle Prantil-Baun<sup>1</sup>, Rani K. Powers<sup>1</sup>, Kenneth Carlson<sup>1</sup>, Matthew  
9 Frieman<sup>6</sup>, Benjamin R. tenOever<sup>4\*</sup>, and Donald E. Ingber<sup>1-3\*</sup>

10

11 <sup>1</sup>Wyss Institute for Biologically Inspired Engineering, Harvard University, Boston, MA  
12 02115, USA.

13 <sup>2</sup>Harvard John A. Paulson School of Engineering and Applied Sciences, Cambridge, MA  
14 02139, USA.

15 <sup>3</sup>Vascular Biology Program and Department of Surgery, Boston Children's Hospital and  
16 Harvard Medical School, Boston, MA 02115, USA.

17 <sup>4</sup>Department of Microbiology, Icahn School of Medicine at Mount Sinai, New York, NY,  
18 USA.

19 <sup>5</sup>Global Health and Emerging Pathogens Institute, Icahn School of Medicine at Mount  
20 Sinai, New York, NY, USA.

21 <sup>6</sup>Department of Microbiology and Immunology, University of Maryland School of  
22 Medicine, Baltimore, MD 21201, USA

23

24 <sup>+</sup>Current address: Division of Pulmonary Sciences and Critical Care Medicine,  
25 Departments of Medicine & Bioengineering, U. of Colorado, Aurora, CO, USA.

26

27 <sup>#</sup>Co-first Authors

28

29 <sup>\*</sup>Co-corresponding Authors:

30 Donald E. Ingber, MD, PhD, Wyss Institute for Biologically Inspired Engineering at  
31 Harvard University, CLSB5, 3 Blackfan Circle, Boston MA 02115 (ph: 617-432-  
32 7044, fax: 617-432-7828; email: [don.ingber@wyss.harvard.edu](mailto:don.ingber@wyss.harvard.edu)

33 Benjamin R. tenOever, PhD, Icahn School of Medicine at Mount Sinai,  
34 Department of Microbiology, New York, NY 10023 (ph: 212-241-7849; email:  
35 [Benjamin.tenOever@mssm.edu](mailto:Benjamin.tenOever@mssm.edu)

---

36           **The rising threat of pandemic viruses, such as SARS-CoV-2, requires**  
37           **development of new preclinical discovery platforms that can more rapidly identify**  
38           **therapeutics that are active *in vitro* and also translate *in vivo*. Here we show that**  
39           **human organ-on-a-chip (Organ Chip) microfluidic culture devices lined by highly**  
40           **differentiated human primary lung airway epithelium and endothelium can be**  
41           **used to model virus entry, replication, strain-dependent virulence, host cytokine**  
42           **production, and recruitment of circulating immune cells in response to infection**  
43           **by respiratory viruses with great pandemic potential. We provide a first**  
44           **demonstration of drug repurposing by using oseltamivir in influenza A virus-**  
45           **infected organ chip cultures and show that co-administration of the approved**  
46           **anticoagulant drug, nafamostat, can double oseltamivir's therapeutic time**  
47           **window. With the emergence of the COVID-19 pandemic, the Airway Chips were**  
48           **used to assess the inhibitory activities of approved drugs that showed inhibition**  
49           **in traditional cell culture assays only to find that most failed when tested in the**  
50           **Organ Chip platform. When administered in human Airway Chips under flow at a**  
51           **clinically relevant dose, one drug – amodiaquine - significantly inhibited infection**  
52           **by a pseudotyped SARS-CoV-2 virus. Proof of concept was provided by showing**  
53           **that amodiaquine and its active metabolite (desethylamodiaquine) also**  
54           **significantly reduce viral load in both direct infection and animal-to-animal**  
55           **transmission models of native SARS-CoV-2 infection in hamsters. These data**  
56           **highlight the value of Organ Chip technology as a more stringent and**  
57           **physiologically relevant platform for drug repurposing, and suggest that**  
58           **amodiaquine should be considered for future clinical testing.**

59

60       The increasing incidence of potential pandemic viruses, such as influenza A virus,  
61 Middle East respiratory syndrome coronavirus (MERS-CoV), Severe acute respiratory  
62 virus (SARS-CoV), and now SARS-CoV-2, requires development of new preclinical  
63 approaches that can accelerate development of effective therapeutics and  
64 prophylactics. The most rapid way to confront a pandemic challenge would be to  
65 repurpose existing drugs that are approved for other medical indications as antiviral  
66 therapeutics. While researchers and clinicians around the world are attempting to do  
67 this for the COVID-19 pandemic, current approaches have been haphazard and  
68 generally rely entirely on results of *in vitro* screens with cell lines. This has resulted in  
69 equivocal results regarding drug efficacies and possible toxicity risks as in the case of  
70 hydroxychloroquine and chloroquine<sup>1-4</sup>, and thus, there is a great need to address this  
71 problem in a more systematic and human-relevant way. Recognizing the potential  
72 danger of unforeseen pandemics over two years ago, the Defense Advanced Research  
73 Projects Agency (DARPA) and National Institutes of Health (NIH) funded work to  
74 explore whether human organ-on-a-chip (Organ Chip) microfluidic culture technology  
75 might be helpful in confronting potential biothreat challenges. We previously showed  
76 that Organ Chips can recapitulate human organ physiology, disease states, and  
77 therapeutic responses to clinically relevant drug exposures with high fidelity<sup>5-9</sup>. Here we  
78 show how human Lung Airway Chips may be used to model human lung responses to  
79 viral infection *in vitro*, and in concert with higher throughput cell-based assays and  
80 animal models, to identify existing approved drugs that have the potential to be

81 repurposed for treating or preventing spread of viral pandemics caused by influenza A  
82 virus or SARS-CoV-2.

83 Infections by respiratory viruses and antiviral drug screening assays are  
84 currently studied *in vitro* using cultured established cell lines, primary tissue-derived  
85 human cells, human organoids, and *ex vivo* human lung tissue cultures despite all  
86 having significant limitations (**Supplementary Table 1**)<sup>10-13</sup>. For example, established  
87 cell lines commonly demonstrate various defects in their capacity to elicit an antiviral  
88 state because normally elicited interferons cause cell cycle arrest, and so this dynamic  
89 is often selected against with continuous passaging<sup>14</sup>. Arguably even more important,  
90 cell lines and even human primary cells grown in conventional cultures do not exhibit  
91 the highly differentiated tissue structures and functions (e.g., mucociliary clearance)  
92 seen in living human organs. Explant cultures of human respiratory tract tissue  
93 circumvent this limitation, but their availability is limited and their viability can only be  
94 maintained for a short time (4-10 days)<sup>12,15</sup>. While human lung organoids provide a  
95 more functional lung epithelium, they do not allow culturing of the epithelium at an air-  
96 liquid interface (ALI) or modeling of other physiologically relevant organ-level features of  
97 lung, such as mucus layer formation, mucociliary clearance, cross-talk between  
98 epithelium and endothelium, or recruitment of circulating immune cells<sup>10,11</sup>, all of which  
99 play key roles in host responses to infection by respiratory viruses. Moreover, in all of  
100 these culture models, drug studies are carried out under static conditions that cannot  
101 predict human responses to clinically relevant, dynamic drug exposure profiles that  
102 result from complex pharmacokinetics (PK) *in vivo*. Thus, there is an urgent need for  
103 alternative preclinical *in vitro* models that specifically mimic human lung responses to

104 infection by potential pandemic respiratory viruses, and because of their ability to  
105 recapitulate human organ-level physiology and pathophysiology, human Lung Chips  
106 offer a potential solution.

## 107 **Influenza A virus infection and immune responses replicated in human Lung** 108 **Chips**

109 To initially assess whether Organ Chip technology<sup>5-8</sup> can be used to create a  
110 preclinical *in vitro* model for therapeutics discovery, we tested it against a drug that is  
111 used clinically for treatment of influenza A viral infections. The human Lung Airway Chip  
112 is a microfluidic device that contains two parallel microchannels separated by an  
113 extracellular matrix (ECM)-coated porous membrane (**Fig. 1a**)<sup>16</sup>. Primary human lung  
114 airway basal stem cells are grown under an air-liquid interface (ALI) on one side of the  
115 membrane in the ‘airway channel’, while interfaced with a primary human lung  
116 endothelium grown on the opposite side of the same membrane, which is exposed to  
117 continuous fluid flow of culture medium within the parallel ‘vascular channel’ (**Fig. 1a**).  
118 This device supports differentiation of the lung airway basal stem cells into a  
119 mucociliary, pseudostratified epithelium with proportions of airway-specific cell types  
120 (ciliated cells, mucus-producing goblet cells, club cells, and basal cells) (**Extended Data**  
121 **Fig. 1a**), as well as establishment of continuous ZO1-containing tight junctions and cilia  
122 (**Fig. 1b**), permeability barrier properties, and mucus production (**Extended Data Fig.**  
123 **1b,c**) similar to those observed in human airway *in vivo*<sup>17</sup>, as well as in prior Airway  
124 Chip studies that used a membrane with smaller pores that did not permit immune cell  
125 transmigration<sup>16</sup>. The underlying human pulmonary microvascular endothelium also

126 forms a continuous planar cell monolayer with cells linked by VE-cadherin containing  
127 adherens junctions (**Fig. 1b**) as it does *in vivo*.

128           Importantly, the highly differentiated airway epithelium in the Airway Chip  
129 expresses higher levels of expression of genes encoding multiple serine proteases  
130 involved in viral entry including TMPRSS2, TMPRSS4, TMPRSS11D, and TMPRSS11E  
131 (DESC1) compared to MDCK cells that are often used to study influenza virus infection  
132 *in vitro* (**Extended Data Fig. 1d**); these proteases are essential for the activation and  
133 propagation of influenza viruses *in vivo*. In addition, compared to their initial state upon  
134 seeding, differentiation of the airway epithelial cells at an ALI on-chip is accompanied by  
135 large increases in protein (**Fig. 1c**) and mRNA expression levels of the SARS-CoV-2  
136 receptor, angiotensin converting enzyme-2 (ACE-2) (**Fig. 1d**) and the TMPRSS2  
137 protease (**Fig. 1e**) that mediate infection by SARS-CoV-2<sup>18,19</sup>.

138           When GFP-labeled influenza A/PuertoRico8/34 (H1N1) virus was introduced into  
139 the air channel of the microfluidic chip to mimic *in vivo* infection with airborne virus (**Fig.**  
140 **1a**), real-time fluorescence microscopic analysis confirmed that the virus infected the  
141 human airway epithelial cells (**Fig. 1b, Supplementary Movie 1**), and this was  
142 accompanied by damage to the epithelium, including disruption of tight junctions, loss of  
143 apical cilia (**Fig. 1b**), and compromised barrier function (**Fig. 1f**). Significantly less  
144 infection was detected in undifferentiated airway basal epithelium prior to culture at an  
145 ALI on-chip, and there was no detectable direct infection of the endothelium by the virus  
146 (**Extended Data Fig. 2a**). Interestingly, however, influenza A virus infection led to  
147 disruption of the lung endothelium on-chip, as evidenced by loss of VE-cadherin

148 containing adherens junctions (**Fig. 1b**), which is consistent with the vascular leakage  
149 that is induced in lungs of human patients with influenza<sup>20</sup>.

150 Analysis of the replication kinetics of five different influenza A virus strains,  
151 including clinical isolates [A/Netherlands/602/2009 (NL/09; H1N1), A/HongKong/8/68  
152 (HK/68; H3N2), A/Panama/2007/99 (Pan/99; H3N2)] and cell culture strains [influenza  
153 Puerto Rico/8/34 (H1N1), A/WSN/1933 (WSN; H1N1)], showed that all of the virus  
154 variants propagate efficiently as demonstrated by large ( $10^3$ - to  $10^4$ -fold) increases in  
155 viral titers over 24 to 48 hours in highly differentiated human lung airway epithelium on-  
156 chip (**Fig. 2a**). Notably, the H3N2 virus strains (HK/68 and Pan/99) exhibited ~10-fold  
157 greater replication efficiency than the H1N1 strains (PR8, WSN, and NL/09) (**Fig. 2a**)  
158 and caused severe barrier disruption (**Fig. 1f**) and more cilia loss (**Extended Data Fig.**  
159 **2b**). These results corroborate the finding that H3N2 is more infectious and virulent, and  
160 causes more severe clinical symptoms in humans<sup>21</sup>. Donor-to-donor variability in terms  
161 of sensitivity to influenza virus infection was minimal in these studies, as similar viral  
162 infectivity was obtained in chips derived from five different healthy epithelial cell donors  
163 (**Extended Data Fig. 2c**).

164 Recruitment of circulating immune cells, such as neutrophils, under dynamic flow  
165 to the site of infection in the airway epithelium contributes significantly to influenza A  
166 virus pathogenesis in the lung<sup>22</sup>; however, this process has not been well investigated in  
167 existing *in-vitro* models due to their 2D static nature. When primary human neutrophils  
168 were perfused through the vascular channel of Airway Chips infected with H1N1 or  
169 H3N2 virus, we observed recruitment of these circulating immune cells to the apical  
170 surface of the activated lung endothelium within minutes (**Fig. 2b top, Supplementary**

171 **Movie 2).** This was followed by transmigration of the neutrophils through the  
172 endothelium and the ECM-coated pores of the intervening membrane, and up into the  
173 airway epithelium over hours (**Fig. 2b bottom**). The neutrophils targeted the influenza A  
174 virus nucleoprotein (NP)-positive infected airway cells (**Extended Data Fig. 3**) and  
175 induced them to coalesce into clusters that decreased in size over time, resulting in  
176 clearance of the virus, as evidenced by the disappearance of GFP-positive cells over a  
177 period of 1-2 days (**Fig. 2b bottom**). Consistent with the ability of H3N2 virus to induce  
178 stronger inflammation relative to H1N1 *in vivo*<sup>21</sup>, H3N2 also stimulated more neutrophil  
179 recruitment than H1N1 (**Fig. 2c**), and neutrophil infiltration into the epithelium  
180 significantly decreased the viral titers of both H1N1 and H3N2 on-chip (**Fig. 2d**),  
181 consistent with the protective role that neutrophils provide by clearing virus *in vivo*<sup>22</sup>.  
182 H1N1 infection also was accompanied by increased secretion of various inflammatory  
183 cytokines and chemokines, including IL-6, IP-10, RANTES, interferon- $\beta$ , and MCP-1,  
184 which could easily be measured in the effluent from the vascular channel (**Fig. 2e**).

185 Variations in secretion of proinflammatory mediators in the human lung airway  
186 contribute to differences in pathogenesis and morbidity observed for different influenza  
187 A virus strains, and analysis of cytokine levels can help clinicians assess disease  
188 severity. Thus, we compared the innate immune responses of the human Airway Chip  
189 to infection with three patient-derived influenza A virus strains with different virulence:  
190 NL/09 (H1N1), Pan/99 (H3N2), and A/HongKong/156/1997 (HK/97; H5N1). When chips  
191 were infected with H3N2 and H5N1 viruses that are known to produce more severe  
192 clinical symptoms than H1N1 in patients, we found that they also stimulated production  
193 of higher levels of cytokines and chemokines, and the most virulent H5N1 strain



194 induced the highest concentrations (**Fig. 2e**). These results mirror the clinical finding  
195 that patients infected with H5N1 have increased serum concentrations of these  
196 inflammatory factors relative to those with H1N1 or H3N2, which significantly contributes  
197 to disease pathogenesis<sup>21</sup>.

### 198 **Recapitulation of the effects of clinically used anti-viral therapeutics**

199 To explore whether the Airway Chip can be used to evaluate the efficacy of  
200 potential antiviral therapeutics, we first tested oseltamivir (Tamiflu), which is the anti-  
201 influenza drug most widely used in the clinic. As oseltamivir is metabolized by the liver  
202 to release oseltamivir acid *in vivo*, we introduced this active metabolite into the vascular  
203 channel of Airway Chip infected with H1N1 virus, mimicking its blood levels after oral  
204 administration. Oseltamivir (1  $\mu$ M) efficiently inhibited influenza A virus replication (**Fig.**  
205 **3a**), prevented virus-induced compromise of barrier function (**Fig. 3b**) and disruption of  
206 epithelial tight junctions (**Fig. 3c**), and decreased production of multiple cytokines and  
207 chemokines on-chip (**Fig. 3d**). Importantly, similar anti-influenza efficacy was detected  
208 in a randomized controlled trial where treatment with Oseltamivir also led to one log  
209 drop in viral titers in nasopharyngeal samples provided by 350 patients<sup>23</sup>. Thus, the  
210 Airway Chip faithfully replicates the effects of oseltamivir previously observed in  
211 humans, suggesting that it may serve as a useful preclinical model to evaluate potential  
212 therapies for virus-induced human lung infections in a preclinical setting.

### 213 **Repurposing of approved drugs as potential anti-influenza therapeutics**

214 Given that host serine proteases on human airway epithelial cells play critical  
215 roles in influenza A virus propagation<sup>12,24</sup>, and their expression is significantly elevated  
216 in the differentiated Airway Chip (**Fig. 1e, Extended Data Fig. 1d**), we explored

217 whether existing approved drugs that inhibit serine proteases could suppress infection  
218 by delivering them into the airway channel of influenza virus-infected chips (e.g, to  
219 mimic intratracheal delivery by aerosol, nebulizer, or inhaler). These studies revealed  
220 that two clinically used anticoagulant drugs, nafamostat (**Fig. 3e**) and trasylol  
221 (**Extended Data Fig. 4a**), significantly reduced influenza H1N1 and H3N2 titers on-chip.  
222 Further exploration of nafamostat's actions revealed that it protects airway barrier  
223 function (**Extended Data Fig. 4b**) and tight junction integrity (**Extended Data Fig. 4c**),  
224 and decreases production of cytokines and chemokines (**Extended Data Fig. 4d**).  
225 Nafamostat and the other protease inhibitors appeared to act by efficiently blocking the  
226 serine proteases- TMPRSS11D and TMPRSS2-mediated enzymatic cleavage of  
227 influenza A viral HA0 protein into HA1 and HA2 subunits (**Extended Data Fig. 4e**),  
228 which is required for viral entry<sup>25</sup>.

229 When we added nafamostat or oseltamivir at different time points during influenza  
230 virus infection on-chip, both nafamostat and oseltamivir exhibited prophylactic and  
231 therapeutic effects (**Fig. 3f**). However, oseltamivir only produced therapeutic effects  
232 when was administered within 48 h post-infection (**Fig. 3f**). This is consistent with the  
233 observation that oseltamivir is only recommended for clinical use within 2 days of  
234 influenza virus infection<sup>26</sup>, which is one of the important limitations of using this antiviral  
235 therapeutic clinically. Nafamostat also exhibited its inhibitory effects over a 48 h time  
236 period (**Fig. 3f**). Impressively, however, combined administration of nafamostat and  
237 oseltamivir exerted more potent inhibition of influenza virus infection, and this combined  
238 regimen was able to double oseltamivir's treatment time window from 48 to 96 hours  
239 (**Fig. 3f**).

240 **Identification of approved drugs as SARS-CoV-2 entry inhibitors**

241           Given the faithful recapitulation of human lung responses to influenza infection,  
242 we quickly pivoted our effort to focus on SARS-CoV-2 infection when we learned of the  
243 emerging COVID-19 pandemic. To alleviate safety concerns and immediately initiate  
244 work in a BSL2 laboratory, we designed SARS-CoV-2 pseudoparticles (SARS-CoV-  
245 2pp) that contain the SARS-CoV-2 spike (S) protein assembled onto luciferase reporter  
246 gene-carrying retroviral core particles<sup>27</sup>, based on the genome sequence of SARS-CoV-  
247 2 released in GenBank on January 12, 2020<sup>28</sup>. We confirmed the incorporation of  
248 SARS-CoV-2 S protein into SARS-CoV-2pp by Western blotting (**Extended Data Fig.**  
249 **5a**), as previously shown in other pseudotyped SARS-CoV-2 viruses<sup>18</sup>. Successful  
250 generation of SARS-CoV-2pp was further confirmed by efficient infection in Huh-7 cells,  
251 a human liver cell line commonly used to study infection of SARS viruses<sup>29</sup>, whereas  
252 control pseudoparticles without the spike protein of SARS-CoV-2 did not infect  
253 (**Extended Data Fig. 5b**). These pseudotyped S protein-expressing viral particles  
254 faithfully reflect key aspects of native SARS-CoV-2 entry into host cells via binding to its  
255 ACE2 receptor<sup>30</sup>, and thus, they can be used to test potential entry inhibitors of SARS-  
256 CoV-2<sup>18,27</sup>. Vesicular stomatitis virus (VSV) GP protein pseudoparticles (VSVpp) were  
257 also generated and used in parallel studies to exclude toxic and non-specific effects of  
258 SARS-CoV-2 entry inhibitors<sup>18,27</sup>.

259           We then used the Huh-7 cells in a 96-well plate assay format to test the effects of  
260 multiple drugs on SARS-CoV-2pp entry that have been approved by the FDA for other  
261 medical indications, including chloroquine, hydroxychloroquine, amodiaquine,  
262 toremifene, clomiphene, arbidol, verapamil, and amiodarone. These drugs were chosen

263 based on the hypothesis that they might have broad-spectrum antiviral activity because  
264 they have been shown to inhibit infection by other SARS, influenza, and Ebola viruses<sup>31-</sup>  
265 <sup>33</sup>. All of these drugs demonstrated dose-dependent inhibition of SARS-CoV-2pp entry  
266 in Huh-7 cells without producing any detectable cell toxicity (**Extended Data Fig. 6**)  
267 when added at 1 and 5  $\mu$ M simultaneously with the virus and culturing for 72 hours (**Fig.**  
268 **4a**). These results were promising; however, Huh-7 cells only express low levels of  
269 ACE2<sup>34</sup> and they do not express TMPRSS2<sup>29,35</sup>. In addition, this cell line was derived  
270 from a human liver tumor, whereas SARS-CoV-2 preferentially targets lung in humans.

271 Thus, to test the clinical translation potential of the drugs that were active in the  
272 Huh-7 cell assay, we evaluated their ability to prevent SARS-CoV-2pp infection in the  
273 more highly differentiated and physiologically relevant human Lung Airway Chips.  
274 SARS-CoV-2pp were introduced into the air channel of the Airway Chips to mimic  
275 human infection by airborne SARS-CoV-2. High levels of the viral pol gene encoded by  
276 the SARS-CoV-2pp were detected in the lung airway epithelial cells in chips infected by  
277 SARS-CoV-2pp within 48 hours, but not in control chips that were inoculated with  
278 pseudoparticles without SARS-CoV-2 spike protein (**Extended Data Fig. 7a**). Infection  
279 with SARS-CoV-2pp was also blocked by a neutralizing antibody that targets the  
280 receptor binding domain (RBD) of SARS-CoV-2 (**Extended Data Fig. 7b**), confirming  
281 that entry of the pseudotyped SARS-CoV-2 virus into the epithelial cells of the human  
282 Lung Airway Chip is mediated specifically by the SARS-CoV-2 S protein. The ability of  
283 SARS-CoV-2pp to efficiently infect human airway epithelial cells on-chip is consistent  
284 with our finding that these highly differentiated lung cells express high levels of its ACE2  
285 receptor as well as TMPRSS2 (**Fig. 1c-e**), which mediate cellular entry of native SARS-

286 CoV-2 virus<sup>18,19</sup>. In addition, immunofluorescence microscopic analysis confirmed that  
287 the SARS-CoV-2pp preferentially infected ciliated cells in the human Lung Airway Chip  
288 (**Extended Data Fig. 7c**), as native SARS-CoV-2 virus does in vivo<sup>19</sup>.

289 Next, we pretreated the human Airway Chips by perfusing their vascular channel  
290 for 24 hours with amodiaquine, toremifene, clomiphene, chloroquine,  
291 hydroxychloroquine, arbidol, verapamil, or amiodarone at clinically relevant levels  
292 similar to their maximum concentration ( $C_{max}$ ) in blood reported in humans (**Table 1**) to  
293 mimic systemic distribution after oral administration. SARS-CoV-2pp were then  
294 introduced into the airway channel and incubated statically while continuously flowing  
295 the drug through the vascular channel for additional 48 hours. qPCR quantitation of viral  
296 mRNA revealed that only three of these drugs — amodiaquine, toremiphene, and  
297 clomiphene — significantly reduced viral entry (by 59.1%, 51.1% and 28.1%,  
298 respectively) (**Fig. 4b**) without producing detectable cytotoxicity (**Extended Data Fig.**  
299 **6b**) under these more clinically relevant experimental conditions. Importantly,  
300 hydroxychloroquine, chloroquine, and arbidol that have no effect on SARS-CoV-2pp  
301 entry in our human Airway Chips also failed to demonstrate clinical benefits in human  
302 clinical trials<sup>1,2,36</sup>. When administered to patients, the most potent drug amodiaquine is  
303 rapidly transformed (half life ~ 5 hr) into its active metabolite, desethylamodiaquine,  
304 which has a much longer half-life (~ 9-18 days)<sup>37</sup>. When desethylamodiaquine was  
305 administered at a clinically relevant dose (1  $\mu$ M; **Table 1**) in the human Airway Chips, it  
306 also reduced entry of the pseudotyped SARS-CoV-2 viral particles by ~60% (**Extended**  
307 **Data Fig. 8**) suggesting that both amodiaquine and its metabolite are active inhibitors of  
308 SARS-CoV-2 S protein-dependent viral entry.

309 **Amodiaquine and desethylamodiaquine inhibit SARS-CoV-2 infection *in vitro* and**  
310 ***in vivo***

311 Finally, we tested the ability of the most potent drug identified in the Airway Chip,  
312 amodiaquine, and its metabolite desethylamodiaquine to inhibit infection by GFP-  
313 labeled SARS-CoV-2 virus at a multiplicity of infection (MOI = 0.1) in Vero E6 cells. We  
314 found that both compounds inhibited infection by SARS-CoV-2 in a dose-dependent  
315 manner (**Fig. 5a**) with half maximal inhibitory concentrations (IC<sub>50</sub>) of 10.3 ± 1.6 and 8.5  
316 ± 3.0 μM for amodiaquine and desethylamodiaquine, respectively. Amodiaquine and  
317 desethylamodiaquine also inhibited infection by wild type SARS-CoV-2 virus when  
318 administered under less stringent conditions (MOI = 0.01), with both compounds  
319 exhibiting IC<sub>50</sub> < 5 μM. In addition, amodiaquine reduced viral load by ~ 3 logs in ACE2-  
320 expressing human lung A549 cells infected with native SARS-CoV-2 when administered  
321 at 10 μM (**Fig. 5b**).

322 Given this potent inhibitory activity against native SARS-CoV-2, we then  
323 evaluated amodiaquine in a hamster COVID-19 model in which the animals are infected  
324 intranasally with SARS-CoV-2 virus (10<sup>3</sup> PFU). The animals were treated once a day for  
325 4 days with amodiaquine (50 mg/kg via subcutaneous injection) beginning one day prior  
326 to SARS-CoV-2 infection. The dosing regimen was selected based on a PK study for  
327 amodiaquine that was carried out in healthy hamsters in parallel. A single dose of  
328 amodiaquine (50 mg/kg) injected subcutaneously revealed that the C<sub>max</sub> for  
329 amodiaquine and its active metabolite desethylamodiaquine were ~ 3.2 and 0.7 μM,  
330 respectively; while the T<sub>1/2</sub> for amodiaquine was 18.1 hours, that of its active metabolite  
331 was significantly greater than the 1 day timecourse analyzed (**Extended Data Fig.**

332 **9a,b**), which is consistent with human clinical data<sup>37</sup>. Analysis of drug concentrations in  
333 lung, kidney, intestine, and heart revealed that both drugs became concentrated in  
334 these organs relative to plasma (**Extended Data Fig. 9c**). Analysis of drug  
335 concentrations 24 hours after dosing revealed significant exposures of amodiaquine and  
336 desethylamodiaquine in lung, kidney, and intestine (**Extended Data Fig. 9c**), with levels  
337 in tissues relative to plasma enhanced 21- to 138-fold for amodiaquine and 8- to 45-fold  
338 for desethylamodiaquine. These PK results, including the extended half lives and tissue  
339 concentration for both compounds are consistent with results of past PK studies in  
340 humans<sup>37</sup>.

341       Importantly, amodiaquine treatment of infected hamsters resulted in ~70%  
342 reduction in SARS-CoV-2 viral load measured by RT-qPCR of the viral N transcript  
343 when measured 3 days after the viral challenge (**Fig. 5c**). Immunohistochemical  
344 analysis of lungs from these animals confirmed that amodiaquine treatment resulted in a  
345 significant reduction in expression of SARS-CoV-2 N protein in these tissues (**Fig. 5d**).  
346 We then carried out studies using a SARS-CoV-2 transmission model in which vehicle  
347 or amodiaquine-treated healthy animals are placed in the same cage with animals that  
348 had been infected with SARS-CoV-2 virus one day earlier. In vehicle controls, this  
349 experimental setup results in a 100% transmission within two days of exposure. In  
350 contrast, the same amodiaquine treatment regimen as described above resulted in a  
351 90% inhibition of SARS-CoV-2 infection as measured by quantifying N transcript levels  
352 (**Fig. 5e**). These results were further corroborated in an independent experiment where  
353 amodiaquine-treated animals showed a greater than one log decrease in viral titers  
354 measured by plaque assays when compared to vehicle (**Fig. 5f**). To our knowledge, this

355 is the first example of successful chemoprophylaxis against SARS-CoV-2 *in vivo*. Taken  
356 together, these results confirm that the antiviral activities identified in the human Lung  
357 Airway Chips translate to the *in vivo* setting, and suggest that amodiaquine may provide  
358 significant protection when taken prophylactically.

359

## 360 **Discussion**

361 Taken together, these data show that human Organ Chips, such as the Lung  
362 Airway Chip, can be used to rapidly identify existing approved drugs that may be  
363 repurposed for pandemic virus applications in crisis situations that require accelerated  
364 development of potential therapeutic and prophylactic interventions. Our work on  
365 repurposing of therapeutics for COVID-19 was initiated on January 13, 2020 (1 day after  
366 the sequence of viral genome was published in GenBank<sup>28</sup>), and our first results with  
367 drugs in Airway Chips were obtained three weeks later. The ability to apply drugs using  
368 dynamic fluid flow on-chip enables the human lung cells to be treated with more  
369 clinically relevant dynamic drug exposures on-chip. While drugs were administered at  
370 levels similar to their  $C_{max}$  here to compare relative potencies, one caveat is that we did  
371 not quantify drug absorption or protein binding in this study. Importantly, by carrying out  
372 mass spectrometry measurements of drug levels in these devices, full PK profiles can  
373 be recapitulated in these Organ Chip models<sup>8</sup>, which should further aid clinical  
374 translation in the future. While animal models remain the benchmark for validation of  
375 therapeutics to move to humans, it is important to note that human Organ Chips are  
376 now being explored as viable alternatives to animal models<sup>38</sup> and regulatory agencies  
377 are encouraging pharmaceutical and biotechnology companies to make use of data



378 from Organ Chips and other microphysiological systems in their regulatory  
379 submissions<sup>39</sup>.

380         These studies led to the identification of multiple approved drugs that could serve  
381 as prophylactics and therapeutics against viral pandemics. The anticoagulant drug,  
382 nafamostat, significantly extended the current treatment time window of oseltamivir from  
383 2 to 4 days after infection by influenza virus, which could have great clinical relevance  
384 given that most patients do not begin treatment until days after they are infected.  
385 Similarly, while the human Organ Chip model successfully predicted the inability of  
386 chloroquine, hydroxychloroquine, and arbidol to work in animals<sup>4</sup> and human  
387 patients<sup>1,2,40</sup>, in contrast with what was reported in cell lines<sup>41,42</sup>, we successfully  
388 identified amodiaquine as a putative therapeutic for SARS-CoV-2 that works both *in*  
389 *vitro* and *in vivo*. Amodiaquine is an anti-malarial drug related to chloroquine and  
390 hydroxychloroquine<sup>43</sup>. This drug was the most potent inhibitor of SARS-CoV-2pp entry  
391 into human airway cells, producing ~60% inhibition when administered under flow at  
392 1.24  $\mu$ M, which should be clinically achievable in the plasma of patients with malaria  
393 who receive 300 mg administration<sup>44</sup>, as well as in tissues such as lung where the drug  
394 and its metabolite concentrate<sup>37</sup>. Importantly, further investigation of amodiaquine  
395 revealed that both this drug and its active metabolite (desethylamodiaquine) do indeed  
396 inhibit native SARS-CoV-2 infection *in vitro* and *in vivo*. Thus, these findings suggest  
397 that the microfluidic human Organ Chip model, combined with existing preclinical cell-  
398 based and animal assays, offers a potentially more clinically relevant test bed for  
399 accelerated discovery of anti-COVID-19 drugs.

400           When considering repurposing of approved drugs for COVID-19, it is important to  
401 recognize that every drug has its own distinct therapeutic and toxicity profile that must  
402 be taken into consideration. Amodiaquine has been widely used for prophylaxis and  
403 treatment of malaria for over 60 years. It is currently used in low resource nations where  
404 the World Health Organization (WHO) recommends it be used in combination with  
405 artesunate for chemoprophylaxis of malaria and as a second line acute treatment for  
406 uncomplicated *P. falciparum*-resistant malaria. Interestingly, the amodiaquine-  
407 artesunate drug combination also has been reported to lower the risk of death from  
408 Ebola virus disease<sup>45</sup>. But amodiaquine was withdrawn from use in the United States  
409 due to rare occurrence of agranulocytosis and liver damage with high doses or  
410 prolonged treatment<sup>46</sup>; however, it continues to be well tolerated among African  
411 populations where it is commonly administered for short duration (3 day course). The  
412 short course is possible because the half life of amodiaquine's active metabolite,  
413 desethylamodiaquine, is very long (on the order of 9 to 18 days) and it concentrates in  
414 organs, including lung<sup>37</sup>.

415           Given the alarming rate at which the SARS-CoV-2 pandemic is spreading,  
416 clinicians must seriously consider the relative risks and benefits of using any existing  
417 approved drug as a new COVID-19 therapy with specific patient populations (e.g., male  
418 versus female, young versus old, Caucasian versus African, etc.) before initiating any  
419 trial in their local communities. Our findings raise the possibility that amodiaquine could  
420 be explored as a chemoprophylaxis therapy to prevent spread of COVID-19 and help  
421 people return to their workplace by treating healthy patients for 3 days, which could then  
422 offer protection for an additional 2 weeks. If amodiaquine were to be advanced to

423 clinical trials for prevention of COVID-19, it would be critical to select patient populations  
424 carefully and appropriate clinical assessments (e.g., blood and liver function tests)  
425 should be carried out before and during administration of drug. This prophylactic  
426 therapy may be particularly valuable in Africa and other low resource nations where this  
427 inexpensive drug is more readily available and where more expensive alternative  
428 therapies are not feasible.

429         The current COVID-19 pandemic and potential future ones caused by influenza  
430 viruses or other coronaviruses, represent imminent dangers and major ongoing public  
431 health concerns. When it comes to repurposing existing antiviral agents, every  
432 experimental assay has its limitations. However, our results suggest that combining  
433 multiplexed cell-based assays with lower throughput/higher content human Organ Chips  
434 that recapitulate human-relevant responses as well as animal models, and focusing on  
435 compounds that are active in all models, could provide a fast track to identify potential  
436 treatments for the current COVID-19 pandemic that have a higher likelihood of working  
437 in human patients. This discovery pipeline may be equally valuable to combat  
438 unforeseen biothreats, such as new pandemic influenza or coronavirus strains, in the  
439 future.

440

## 441 **METHODS**

442         **Human Airway Chip Culture.** Microfluidic two-channel Organ Chip devices  
443 containing membranes with 7  $\mu\text{m}$  pores were obtained from Emulate Inc. (Boston, MA).  
444 Each microdevice contains two adjacent parallel microchannels (apical, 1 mm wide  $\times$  1  
445 mm high; basal, 1 mm wide  $\times$  0.2 mm high; length of overlapping channels, 16.7 mm)

446 separated by the porous membrane. Similar results were also obtained in some studies  
447 not involving immune cell recruitment using 2-channel devices fabricated from poly-  
448 dimethyl siloxane with a PET membrane containing 0.4  $\mu\text{m}$  pores, as used in past  
449 Airway Chip studies<sup>16</sup>. Before cell plating, both channels of these devices were washed  
450 with 70% ethanol, filled with 0.5 mg/mL ER1 solution in ER2 buffer (Emulate Inc.) and  
451 placed under UV lamp (Nailstar, NS-01-US) for 20 min to activate the surface for protein  
452 coating. The channels were then washed sequentially with ER2 buffer and PBS. The  
453 porous membranes were coated on both sides with collagen type IV from human  
454 placenta (0.5 mg/mL in water; Sigma-Aldrich) at room temperature overnight. The  
455 solution was then aspirated from the chip, which was then used for seeding cells.

456 Primary human lung airway epithelial basal stem cells (Lonza, USA; Catalog #: CC-  
457 2540S) obtained from healthy donors 448571, 446317, 623950, 485960, and 672447)  
458 were expanded in 75  $\text{cm}^2$  tissue culture flasks using airway epithelial cell growth  
459 medium (Promocell, Germany) until 60-70% confluent. Primary human pulmonary  
460 microvascular endothelial cells (Cell Biologics, USA) were expanded in 75  $\text{cm}^2$  tissue  
461 culture flasks using human endothelial cell growth medium (Cell Biologics, USA) until  
462 70-80% confluent.

463 To create the human Airway Chips, endothelial cells ( $2 \times 10^7$  cells/mL) were first  
464 seeded in the bottom channel by inverting the chip for 4 h in human endothelial cell  
465 growth medium, followed by inverting the chip again and seeding of the top channel with  
466 the lung airway epithelial basal stem cells ( $2.5 \times 10^6$  cells/mL) for 4 h in airway epithelial  
467 cell growth medium. The respective medium for each channel was refreshed and the  
468 chips were incubated under static conditions at 37°C under 5%  $\text{CO}_2$  overnight. The

469 adherent cells were then continuously perfused with the respective cell culture medium  
470 using an IPC-N series peristaltic pump (Ismatec) or Zoe (Emulate) at a volumetric flow  
471 rate of 60  $\mu$ L/h. After 5-7 days, the apical medium was removed while allowing air to fill  
472 the channel to establish an ALI, and the airway epithelial cells were cultured for 3-4  
473 additional weeks while being fed only by constant flow of PneumaCult-ALI medium  
474 (StemCell) supplemented with 0.1% VEGF, 0.01% EGF, and 1mM CaCl<sub>2</sub> from an  
475 Endothelial Cell Medium Kit (Cell Biological, M1168) through the bottom vascular  
476 channel. The chips were cultured in an incubator containing 5% CO<sub>2</sub> and 16-18% O<sub>2</sub> at  
477 85-95% humidity, and the apical surface of the epithelium was rinsed once weekly with  
478 PBS to remove cellular debris and mucus. Highly differentiated human airway structures  
479 and functions can be maintained in the human lung Airway Chip for more than 2  
480 months.

481 **Immunofluorescence microscopy.** Cells were washed with PBS through the  
482 apical and basal channels, fixed with 4% paraformaldehyde (Alfa Aesar) for 20-25 min,  
483 and then washed with PBS before being stored at 4°C. Fixed tissues were  
484 permeabilized on-chip with 0.1% Triton X-100 (Sigma-Aldrich) in PBS for 5 min,  
485 exposed to PBS with 10% goat serum (Life Technologies) and 0.1% Triton X-100 for 30  
486 min at room temperature, and then incubated with primary antibodies (**Supplementary**  
487 **Table 2**) diluted in incubation buffer (PBS with 1% goat serum and 0.1% Triton X-100)  
488 overnight at 4°C, followed by incubation with corresponding secondary antibodies  
489 (**Supplementary Table 2**) for 1 h at room temperature; nuclei were counterstained with  
490 DAPI (Invitrogen) after secondary antibody staining. Fluorescence imaging was carried

491 out using a confocal laser-scanning microscope (SP5 X MP DMI-6000, Germany) and  
492 image processing was done using Imaris software (Bitplane, Switzerland).

493 **Barrier function assessment.** To measure tissue barrier permeability, 50  $\mu$ l cell  
494 medium containing Cascade blue (607 Da) (50  $\mu$ g/mL; Invitrogen) was added to bottom  
495 channel and 50  $\mu$ l cell medium was added to top channel. The fluorescence intensity of  
496 medium of top and bottom channels was measured 2 h later in three different human  
497 Airway chips. The apparent permeability was calculated using the formula:  $P_{app} = J/(A \times$   
498  $\Delta C)$ , where  $P_{app}$  is the apparent permeability,  $J$  is the molecular flux,  $A$  is the total area  
499 of diffusion, and  $\Delta C$  is the average gradient.

500 **Mucus quantification.** Mucus present in the airway channel was isolated by  
501 infusing 50  $\mu$ l PBS into the upper channel of the Airway Chip, incubating for 1 h at 37°C,  
502 and then collecting the fluid and storing it at -80°C before analysis, as previously  
503 described<sup>6</sup>. Quantification of mucus production was carried out by quantifying Alcian  
504 Blue Staining (Thermo Fisher Scientific) and comparing to serially diluted standards of  
505 mucin (Sigma-Aldrich) in PBS.

506 **Quantitative reverse transcription-polymerase chain reaction (RT-qPCR).** Total  
507 RNA was extracted from differentiated human Airway chips, pre-differentiated lung  
508 airway epithelial cells, or MDCK cells using TRIzol (Invitrogen). cDNA was then  
509 synthesized using AMV reverse transcriptase kit (Promega) with Oligo-dT primer. To  
510 detect cellular gene-expression level, quantitative real-time PCR was carried out  
511 according to the GoTaq qPCR Master Mix (Promega) with 20  $\mu$ l of a reaction mixture  
512 containing gene-specific primers (**Supplementary Table 3**). The expression levels of  
513 target genes were normalized to GAPDH.

514           **Influenza viruses.** Influenza virus strains used in this study include A/PR/8/34  
515 (H1N1), GFP-labeled A/PR/8/34 (H1N1), A/WSN/33 (H1N1), A/Netherlands/602/2009  
516 (H1N1), A/Hong Kong/8/68/ (H3N2), A/Panama/2007/99 (H3N2), and A/Hong  
517 Kong/156/1997 (H5N1). A/PR/8/34 (H1N1), GFP-labeled A/PR/8/34 (H1N1), A/WSN/33  
518 (H1N1) were generated using reverse genetics techniques. Other viruses were obtained  
519 from the Centers for Disease Control and Prevention (CDC) or kindly shared by Drs. P.  
520 Palese, R.A.M. Fouchier, and A. Carcia-Sastre.

521           **Influenza virus infection of human Airway Chips.** Human Airway Chips were  
522 infected with influenza viruses by flowing 30  $\mu$ L of PBS containing the indicated  
523 multiplicity of infection (MOI) of viral particles into the apical channel, incubating for 2 h  
524 at 37°C under static conditions, and then removing the medium to reestablish an ALI. To  
525 measure virus propagation, the apical channel was incubated with 50  $\mu$ L of PBS for 1 h  
526 at 37°C at various times, and then the apical fluid and vascular effluent were collected  
527 from the apical and basal channels, respectively, to quantify viral load using the plaque  
528 formation assay; released cytokines and chemokines were analyzed in these same  
529 samples. The tissues cultured on-chip were also fixed and subjected to  
530 immunofluorescence microscopic analysis.

531           To test the efficacy of oseltamivir acid, Airway Chips infected with influenza virus  
532 (MOI = 0.1) were treated with 1  $\mu$ M oseltamivir acid (Sigma-Aldrich) under flow (60  $\mu$ L/h)  
533 through the vascular channel. To explore the effects of serine protease inhibitors on  
534 influenza infection, Nafamostat (Abcam) or Trasyolol (G-Biosciences) was delivered into  
535 the airway channel of influenza-infected chip (MOI = 0.1). Two days later, the virus  
536 samples were collected for detection of viral load and the vascular effluents were

537 collected for analysis of cytokines and chemokines. In the treatment time window  
538 detection experiment, oseltamivir acid (1  $\mu$ M), nafamostat (10  $\mu$ M), or both were added  
539 to the influenza H1N1-infected Airway Chips (MOI = 0.1) at indicated times. Oseltamivir  
540 was perfused through the vascular channel, while nafamostat was introduced in 20  $\mu$ L  
541 of PBS and incubated in the airway channel for 48 hours. Fluids samples were then  
542 collected from both channels for detection of viral load.

543 **Analysis of neutrophil infiltration.** Neutrophils isolated from fresh human blood  
544 using a Ficoll-Paque PLUS (GE Healthcare) gradient were resuspended in medium at a  
545 concentration of  $5 \times 10^6$  cells/mL, which is within the normal range ( $2.5\text{-}7.5 \times 10^6$   
546 cells/ml) of neutrophils found in human blood. The isolated neutrophils were labeled with  
547 Cell Tracker Red CMTPX (Invitrogen) and injected into the vascular channel of inverted  
548 Airway Chips infected with influenza virus (MOI = 0.1) at a flow rate of 50-100  $\mu$ L/h  
549 using a syringe pump; 2 h later unbound neutrophils were washed away by flowing cell-  
550 free medium for 24 h. Virus samples were collected by incubating the airway channel  
551 with 50  $\mu$ L of PBS for 1 h at 37°C, collecting the fluid, and detecting virus load using the  
552 plaque assay. The cell layers were fixed on-chip and subjected to immunofluorescence  
553 microscopic analysis for influenza virus NP (Invitrogen) and neutrophils (CD45,  
554 Biolegend). Micrographs of four or five random areas were taken from chips for  
555 subsequent quantification of infiltrated neutrophils. To study the interaction between  
556 influenza virus and neutrophils, Airway Chips were infected with GFP-labeled PR8 virus  
557 (MOI = 0.1) for 24 h. Cell Tracker Red CMTPX-labeled neutrophils ( $5 \times 10^6$  cells/mL)  
558 were perfused in medium through the vascular channel of infected Airway Chips.  
559 Immunofluorescence microscopic analysis were carried out at indicated times.



560           **Plaque formation assay.** Virus titers were determined using plaque formation  
561 assays. Confluent MDCK cell monolayers in 12-well plate were washed with PBS,  
562 inoculated with 1 mL of 10-fold serial dilutions of influenza virus samples, and incubated  
563 for 1 h at 37°C. After unabsorbed virus was removed, the cell monolayers were overlaid  
564 with 1 mL of DMEM (Gibco) supplemented with 1.5% low melting point agarose (Sigma-  
565 Aldrich) and 2 µg/mL TPCK-treated trypsin (Sigma-Aldrich). After incubation for 2-4  
566 days at 37°C under 5% CO<sub>2</sub>, the cells were fixed with 4% paraformaldehyde, and  
567 stained with crystal violet (Sigma-Aldrich) to visualize the plaques; virus titers were  
568 determined as plaque-forming units per milliliter (PFU/mL). Plaque titers from in vivo  
569 lung samples were determined post mortem by complete lung dissection and  
570 dissociation in PBS. Debris was pelleted at 5000 rpm and the remaining supernatant  
571 was used to determine PFU/mL.

572           **Analysis of cytokines and chemokines.** Vascular effluents from Airway Chips  
573 were collected and analyzed for a panel of cytokines and chemokines, including IL-6,  
574 IP-10, MCP-1, RANTES, interferon-β, using custom ProcartaPlex assay kits  
575 (Invitrogen). Analyte concentrations were determined using a Luminex100/200  
576 Flexmap3D instrument coupled with Luminex XPONENT software (Luminex, USA).

577           **Analysis of cleavage of virus hemagglutinin (HA) by serine proteases.** For  
578 analysis of HA cleavage by serine proteases in the presence or absence of nafamostat,  
579 MDCK cells ( $5 \times 10^5$  cells per well in 6-well plates) were transfected with 2-5 µg serine  
580 protease expression plasmid or empty vector using TransIT-X2 Dynamic Delivery  
581 System (Mirus). One day later, the cells were infected with influenza A/WSN/33 (H1N1)  
582 virus (MOI = 0.01) in DMEM supplemented with 1% FBS, and then cultured in the

583 presence or absence of 10  $\mu$ M nafamostat. Two days post-infection, the supernatant  
584 was harvested and subjected to Western blot analysis using anti-HA1 antibody.

585 **Drugs for the SARS-CoV2pp studies.** Chloroquine (cat. #ab142116),  
586 Hydroxychloroquine (cat. #ab120827), arbidol (cat. #ab145693), toremifene (cat.  
587 #ab142467), clomiphene (cat. #ab141183), verapamil (cat. #ab146680), and  
588 amiodarone (cat. #ab141444) were purchased from Abcam; amodiaquine  
589 dihydrochloride dihydrate (cat. #A2799) was purchased from Sigma-Aldrich; N-  
590 desethylamodiaquine (cat. #20822) was purchased from Caymanchem. Chloroquine  
591 was dissolved in water to a stock concentration of 10 mM; all other tested drugs were  
592 dissolved in dimethyl sulfoxide (DMSO) to a stock concentration of 10 mM. The purity of  
593 all evaluated drugs was > 95%.

594 **Plasmids.** Plasmid expressing the spike protein of SARS-CoV-2 (pCMV3-SARS-  
595 CoV2-Spike) was purchased from Sino Biological Inc. (Beijing, China). pCMV-VSVG,  
596 pNL4-3.Luc.R-E-, and pAdvantage were obtained from Addgene, NIH AIDS Reagent  
597 Program, and Promega, respectively. All plasmids used for transfection were amplified  
598 using the Maxiprep Kit (Promega) according to the manufacturer's instructions.

599 **Pseudotyped virus production.** HEK293T cells ( $5 \times 10^5$  cell per well) were seeded  
600 into 6-well plates. 24 h later, HEK293T cells were transfected with 1.0  $\mu$ g of pNL4-  
601 3.Luc.R-E-, 0.07  $\mu$ g of pCMV3-SARS-CoV-2-Spike, and 0.3  $\mu$ g of pAdvantage with the  
602 TransIT-X2 transfection reagent (Mirus) according to the manufacturer's instructions to  
603 produce SARS-CoV-2 spike pseudotyped HIV virions (SARS-CoV-2pp). Similarly,  
604 HEK293T cells were transfected with 1.0  $\mu$ g of pNL4-3.Luc.R-E-, 0.7  $\mu$ g of pCMV-  
605 VSVG, and 0.3  $\mu$ g of pAdvantage to produce VSVG pseudotyped HIV virions (VSVpp).

606 The supernatants containing the pseudotyped viruses were collected at 48 h post-  
607 transfection and clarified by the removal of floating cells and cell debris with  
608 centrifugation at  $10^3$  g for 5 min. The culture supernatants containing pseudotyped  
609 viruses particles were either used immediately or flash frozen in aliquots and stored at  
610  $80^{\circ}\text{C}$  until use after being concentrated using a PEG virus precipitation kit (Abcam).  
611 Incorporation of the SARS-CoV-2 S protein into the SARS-CoV-2pp was confirmed  
612 using Western Blot analysis with anti-SARS-CoV-2 S1 chimeric monoclonal antibody  
613 with combined constant domains of the human IgG1 molecule and mouse variable  
614 regions (40150-D001 Sinobiological, 1:500); a recombinant receptor binding domain  
615 (RBD) fragment from the S1 region was used as a control (BEI resources, NR-52306).  
616 Similar results were also obtained using a commercially available pseudotyped SARS-  
617 CoV-2 S protein expressing viral particles (Amsbio LLC).

618 **Infection assay using pseudotyped viruses in Huh-7 cells.** Drugs were tested  
619 using entry assays for SARS-CoV-2pp and VSVpp, as previously described<sup>27</sup>. Infections  
620 were performed in 96-well plates. SARS-CoV-2pp or VSVpp was added to  $5 \times 10^3$  Huh-  
621 7 cells (a human liver cell line) per well in the presence or absence of the test drugs or  
622 compounds. The mixtures were then incubated for 72 hours at  $37^{\circ}\text{C}$ . Luciferase activity,  
623 which reflects the number of pseudoparticles in the host cells, was measured at 72 h  
624 post-infection using the Bright-Glo reagent (Promega) according to the manufacturer's  
625 instructions. Test drugs were serially diluted to a final concentration of 1 or 5  $\mu\text{M}$ . The  
626 maximum infectivity (100%) was derived from the untreated wells; background (0%)  
627 from uninfected wells. To calculate the infection values, the luciferase background  
628 signals were subtracted from the intensities measured in each of the wells exposed to

629 drug, and this value was divided by the average signals measured in untreated control  
630 wells and multiplied by 100%.

631 **SARS-CoV-2pp infection of human lung Airway Chips.** To measure infection in  
632 human Airway Chips with the pseudotyped virus, drugs were flowed through the  
633 vascular channel of the Airway Chips at their reported  $C_{max}$  in human blood (**Table 2**)  
634 while airway channel was statically treated with the same concentrations of drugs. 24 h  
635 later, the SARS-CoV-2pp was delivered into the airway channel in a small volume (30  
636  $\mu$ L) of medium containing the drug at the same concentrations and incubated statically  
637 for additional 48 h while the drug at the same dose was continuously flowed through the  
638 vascular channel at 37°C. The lung airway epithelium was then collected by RNeasy  
639 Micro Kit (Qiagen) according to the manufacturer's instructions and subjected to  
640 analysis of viral load by qRT-PCR. As we only focused in assessing viral entry in these  
641 studies, the chips were only lined by differentiated airway epithelium and did not contain  
642 endothelium.

643 **Native SARS-CoV-2 in vitro infection assay.** All work with native SARS-CoV-2  
644 virus was performed in a Biosafety Level 3 laboratory and approved by our Institutional  
645 Biosafety Committee. Vero E6 cells (ATCC# CRL 1586) were cultured in DMEM  
646 (Quality Biological), supplemented with 10% (v/v) heat inactivated fetal bovine serum  
647 (Sigma), 1% (v/v) penicillin/streptomycin (Gemini Bio-products), and 1% (v/v) L-  
648 glutamine (2 mM final concentration, Gibco) (Vero Media). Cells were maintained at  
649 37°C (5% CO<sub>2</sub>). GFP-labeled native SARS-CoV-2 was generously provided by Dr.  
650 Ralph S. Baric<sup>47</sup>. Stocks were prepared by infection of Vero E6 cells for two days when  
651 CPE was starting to become visible. Media were collected and clarified by centrifugation

652 prior to being aliquoted for storage at  $-80^{\circ}\text{C}$ . Titer of stock was determined by plaque  
653 assay using Vero E6 cells. GFP-labeled native SARS-CoV-2 infection and drug testing  
654 were performed in Vero E6 cells. Cells were plated in clear bottom, black 96-well  
655 plates one day prior to infection. Drug was diluted from stock to  $50\ \mu\text{M}$  and an 8-point  
656 1:2 dilution series prepared in duplicate in Vero Media. Each drug dilution and control  
657 was normalized to contain the same concentration of drug vehicle (e.g., DMSO). Cells  
658 were pre-treated with drug for 2 h at  $37^{\circ}\text{C}$  (5%  $\text{CO}_2$ ) prior to infection with SARS-CoV-2  
659 at  $\text{MOI} = 0.1$ . Plates were then incubated at  $37^{\circ}\text{C}$  (5%  $\text{CO}_2$ ) for 48 h, followed by  
660 fixation with 4% PFA, nuclear staining with Hoechst (Invitrogen), and data acquisition on  
661 a Celigo 5-channel Imaging Cytometer (Nexcelom Bioscience, Lawrence, CA). The  
662 percent of infected cells was determined for each well based on GFP expression by  
663 manual gating using the Celigo software. In addition to plates that were infected, parallel  
664 plates were left uninfected to monitor cytotoxicity of drug alone. Plates were incubated  
665 at  $37^{\circ}\text{C}$  (5%  $\text{CO}_2$ ) for 48 h before performing CellTiter-Glo (CTG) assays as per the  
666 manufacturer's instruction (Promega, Madison, WI). Luminescence was read on a  
667 BioTek Synergy HTX plate reader (BioTek Instruments Inc., Winooski, VT) using the  
668 Gen5 software (v7.07, Biotek Instruments Inc., Winooski, VT). Similar results were  
669 obtained with wild type SARS-CoV-2 virus, using a previously published method<sup>45</sup>.

670 **Hamster PK studies.** Amodiaquine dihydrochloride dihydrate (Sigma, #A2799) was  
671 formulated at 10 mg/ml in 12% sulfobutylether- $\beta$ -cyclodextrin in water at pH 5.0 and  
672 administered to LVG male hamsters ( $n=3$ ) at 50 mg/kg by subcutaneous injection (dose  
673 volume of 5 ml/kg). Blood samples were drawn at 0.5, 1, 2, 4, 8 and 24 hours and  
674 plasma was prepared. At 24 hours, animals were anesthetized and then perfused to

675 clear tissues of blood. Tissues of interest (lung, heart, kidney and intestine) were  
676 removed and homogenized at a 1:3 (w/v) ratio in water. The desired serial  
677 concentrations of working reference analyte solutions of amodiaquine (Selleckchem)  
678 and desethylamodiaquine (Cayman Biochemicals) were achieved by diluting stock  
679 solution of analyte with 50% acetonitrile (0.1% Formic acid) in water solution. 20  $\mu$ L of  
680 working solutions were added to 20  $\mu$ L of the blank LVG hamster plasma to achieve  
681 calibration standards of 1 to 1000 ng/mL in a total volume of 40  $\mu$ L. 40  $\mu$ L standards, 40  
682  $\mu$ L QC samples and 40  $\mu$ L unknown samples (20  $\mu$ L plasma with 20  $\mu$ L blank solution)  
683 were added to 200  $\mu$ L of acetonitrile containing internal standard and 0.1% Formic acid  
684 mixture for precipitating protein respectively. The samples were then vortexed for 30 s.  
685 After centrifugation at 4°C, 3900 rpm for 15 min, the supernatant was diluted 3 times  
686 with water. 5  $\mu$ L of diluted supernatant was injected into the LC/MS/MS system (AB API  
687 5500 LC/MS/MS instrument with a Phenomenex Synergi 2.5 $\mu$ m Polar-RP 100A (50  $\times$  3  
688 mm) column) for quantitative analysis. The mobile phases used were 95% water (0.1%  
689 formic acid) and 95% acetonitrile (0.1% formic acid). All PK studies were conducted by  
690 Pharmaron in Ningbo, China.

691 **Hamster Efficacy Studies.** SARS-CoV-2 Isolate USA-WA1/ 2020 (NR-52281) was  
692 provided by the Center for Disease Control and Prevention. SARS-CoV-2 was  
693 propagated in Vero E6 cells in DMEM supplemented with 2% FBS, 4.5 g/L D-glucose, 4  
694 mM L-glutamine, 10 mM Non-Essential Amino Acids, 1 mM Sodium Pyruvate and 10  
695 mM HEPES and filtered through an Amicon Ultracel 15 (100kDa) centrifugal filter. Flow  
696 through was discarded and virus resuspended in DMEM supplemented as above.  
697 Infectious titers of SARS-CoV-2 stock were determined using a plaque assay in Vero E6

698 cells in Minimum Essential Media supplemented with 2% FBS, 4 mM L-glutamine, 0.2%  
699 BSA, 10 mM HEPES and 0.12% NaHCO<sub>3</sub> and 0.7% agar.

700 3-5 week-old Syrian hamsters were acclimated to the CDC/USDA-approved BSL-3  
701 facility of the Global Health and Emerging Pathogens Institute at the Icahn School of  
702 Medicine at Mount Sinai for 2-4 days. In our direct infection model, hamsters were given  
703 a subcutaneous injection posteriorly with drug within 2 hours of drug (amodiaquine)  
704 reconstitution one day before SARS-CoV-2 infection and every day thereafter until  
705 terminal lung harvest on day 3 post infection. Amodiaquine was reconstituted in 12%  
706 sulfobutylether- $\beta$ -cyclodextrin (Selleckchem) in water(w/w) (with HCl/NaOH) at pH 5.0.  
707 Hamsters were intranasally infected with 10<sup>3</sup> PFU of passage 3 SARS-CoV-2 USA-  
708 WA1/2020 in 100  $\mu$ l of PBS and sacrificed on day 3 of infection. Animals were  
709 anesthetized by intraperitoneal injection of 200  $\mu$ l of ketamine and xylazine (4:1) and  
710 provided thermal support while unconscious. Whole lungs were harvested and  
711 homogenized in 1 mL of PBS, and homogenates were then spun down at 10,000 rcf for  
712 5 minutes; the supernatant was subsequently discarded, and the lung pellet was  
713 resuspended in Trizol. The same protocol was used in our animal-to-animal infection  
714 model, except amodiaquine was administered to healthy hamsters for one day before  
715 they were housed with untreated hamsters that were infected with SARS-CoV-2 one  
716 day earlier, and drug continued to be administered daily for 3 more days, after which  
717 infection transmission was quantified.

718 Lung RNA was extracted by phenol chloroform extraction and DNase treatment  
719 using DNA-free DNA removal kit (Invitrogen). After cDNA synthesis of RNA samples by  
720 reverse transcription using SuperScript II Reverse Transcriptase (Invitrogen) with oligo

721 d(T) primers, quantitative RT-PCR was performed using KAPA SYBR FAST qPCR  
722 Master Mix Kit (Kapa Biosystems) on a LightCycler 480 Instrument II (Roche) for  
723 subgenomic nucleocapsid (N) RNA (sgRNA) and actin using the following primers: Actin  
724 forward primer: 5'-CCAAGGCCAACCGTGAAAAG-3', Actin reverse primer 5'-  
725 ATGGCTACGTACATGGCTGG-3', N sgRNA forward primer: 5'-  
726 CTCTTGATAGATCTGTTCTCTAAACGAAC-3', N sgRNA reverse primer: 5'-  
727 GGTCCACCAAACGTAATGCG-3' Relative sgRNA levels were quantified by  
728 normalizing sgRNA to actin expression and normalizing drug-treated infected lung RNA  
729 to vehicle-treated infected controls. All RNA Seq data utilized the Illumina TruSeq  
730 Stranded mRNA LP as per the manufacturer's instructions. Illumina libraries were  
731 quantified by Qbit and Agilent Bioanalyzer prior to being run on an Illumina NextSeq500  
732 using a high capacity flow cell. All Raw data was processed as described elsewhere<sup>48</sup>   
733 Raw sequencing data files can be found on NCBI GEO (GSE143613).

734 **Statistical analysis.** All results presented are the result of at least two independent  
735 experiments, and if not specified, at least three chips per donor were used in each  
736 Organ Chip experiment. Tests for statistically significant differences between groups  
737 were performed using a two-tailed Student's t-test and the Bonferroni correction for  
738 multiple hypothesis testing. Differences were considered significant when the *P* value  
739 was less than 0.05 (\*,  $P < 0.05$ ; \*\*,  $P < 0.01$ ; \*\*\*,  $P < 0.001$ ; n.s., not significant). All results  
740 are expressed as means  $\pm$  standard deviation (SD);  $N \geq 3$  in all studies.

741 **Data and materials availability.** Sharing of materials will be subject to standard  
742 material transfer agreements. The nucleotide sequences used in the study have been  
743 deposited in GeneBank under accession numbers CY034139.1, CY0334138.1,



744 X17336.1, HE802059.1, CY034135.1, CY034134.1, D10598.1, M12597.1, CY176949.1,  
745 CY176948.1, CY176947.1, CY176942.1, CY176945.1, CY176944.1, CY176943.1,  
746 CY176946.1, DQ487334.1, DQ487333.1, DQ487335.1, DQ487340.1, DQ487339.1,  
747 DQ487337.1, DQ487338.1, and DQ487336.1. Additional data are presented in the  
748 Supplementary Materials.

749 **Contributors.** L.S., H.B., and D.E.I. conceived this study, and D.E.I. developed the  
750 overall collaborative discovery pipeline. L.S. and H.B. performed and analyzed  
751 experiments with other authors assisting with experiments and data analysis. M.B.  
752 assisted with cytokine detection assay. W.C., C.O., A.J., A.N., and S.K. assisted with  
753 RNA extraction and qRT-PCR. D.Z. and G.G. assisted in the characterization of CoV-  
754 2pp. R.K.P. assisted in statistical analysis. R.P. and S.E.G. coordinated experiments  
755 and managed the project progress. R.M., D.H., K.O., S.H., T.J., R.A.A. and B.R.t. tested  
756 the efficacy of amodiaquine against native SARS-CoV-2 in hamster SARS-CoV-2  
757 infection model. K.C. coordinated the hamster PK studies and assisted in the design of  
758 dosing and drug formulation in the hamster efficacy studies. J.L., R.H., M.M., S.W., and  
759 M.F. tested the activity of amodiaquine and desethylamodiaquine against native SARS-  
760 CoV-2 in Vero E6 cells. L.S., H.B. and D.E.I. wrote the manuscript with all authors  
761 providing feedback.

762 **Declaration of interests.** D.E.I. is a founder and holds equity in Emulate Inc., and  
763 chairs its advisory board. D.E.I., L. S., R. P., H.B., K H. B., and M. R. are inventors on  
764 relevant patent applications hold by Harvard University.

765 **Acknowledgements.** We thank the CDC, Dr. A. Garcia-Sastre, Dr. R.A.M.  
766 Fouchier, and Dr. X. Sealens for providing the influenza virus strains and the influenza

767 virus rescue systems. We acknowledge research funding from NIH (NCATS 1-UG3-HL-  
768 141797-01 and NCATS 1-UH3-HL-141797-01 to D.E.I.), DARPA under Cooperative  
769 Agreements (W911NF-12-2-0036 to D.E.I. and W911NF-16-C-0050 to D.E.I., M.F., and  
770 B.tO.). Bill and Melinda Gates Foundation (to D.E.I. and M.F.), Marc Haas Foundation  
771 (to B.tO.), and the Wyss Institute for Biologically Inspired Engineering at Harvard  
772 University (D.E.I.).

773 **Correspondence and requests for materials** should be addressed to D.E.I., and  
774 to B.tO for issues related to hamster studies.

775

## 776 **REFERENCES**

- 777 1 Boulware, D. R. *et al.* A Randomized Trial of Hydroxychloroquine as  
778 Postexposure Prophylaxis for Covid-19. *N Engl J Med*,  
779 doi:10.1056/NEJMoa2016638 (2020).
- 780 2 Borba, M. G. S. *et al.* Effect of High vs Low Doses of Chloroquine Diphosphate  
781 as Adjunctive Therapy for Patients Hospitalized With Severe Acute Respiratory  
782 Syndrome Coronavirus 2 (SARS-CoV-2) Infection: A Randomized Clinical Trial.  
783 *JAMA Netw Open* **3**, e208857, doi:10.1001/jamanetworkopen.2020.8857 (2020).
- 784 3 Hu, T. Y., Frieman, M. & Wolfram, J. Insights from nanomedicine into chloroquine  
785 efficacy against COVID-19. *Nature Nanotechnology*, doi:10.1038/s41565-020-  
786 0674-9 (2020).
- 787 4 Funnel, e. a. Emerging preclinical evidence does not support broad use of  
788 Hydroxychloroquine in COVID-19 patients. *Nature Communications*, doi:In Press  
789 (2020).

- 790 5 Huh, D. *et al.* Reconstituting organ-level lung functions on a chip. *Science* **328**,  
791 1662-1668, doi:10.1126/science.1188302 (2010).
- 792 6 Huh, D. *et al.* A human disease model of drug toxicity-induced pulmonary edema  
793 in a lung-on-a-chip microdevice. *Sci Transl Med* **4**, 159ra147,  
794 doi:10.1126/scitranslmed.3004249 (2012).
- 795 7 Chou, D. B. *et al.* On-chip recapitulation of clinical bone marrow toxicities and  
796 patient-specific pathophysiology. *Nat Biomed Eng* **4**, 394-406,  
797 doi:10.1038/s41551-019-0495-z (2020).
- 798 8 Herland, A. *et al.* Quantitative prediction of human pharmacokinetic responses to  
799 drugs via fluidically coupled vascularized organ chips. *Nat Biomed Eng* **4**, 421-  
800 436, doi:10.1038/s41551-019-0498-9 (2020).
- 801 9 Prantil-Baun, R. *et al.* Physiologically Based Pharmacokinetic and  
802 Pharmacodynamic Analysis Enabled by Microfluidically Linked Organs-on-Chips.  
803 *Annu Rev Pharmacol Toxicol* **58**, 37-64, doi:10.1146/annurev-pharmtox-010716-  
804 104748 (2018).
- 805 10 Hui, K. P. Y. *et al.* Tropism, replication competence, and innate immune  
806 responses of influenza virus: an analysis of human airway organoids and ex-vivo  
807 bronchus cultures. *Lancet Respir Med* **6**, 846-854, doi:10.1016/S2213-  
808 2600(18)30236-4 (2018).
- 809 11 Ramani, S., Crawford, S. E., Blutt, S. E. & Estes, M. K. Human organoid cultures:  
810 transformative new tools for human virus studies. *Curr Opin Virol* **29**, 79-86,  
811 doi:10.1016/j.coviro.2018.04.001 (2018).

- 812 12 Chan, R. W., Chan, M. C., Nicholls, J. M. & Malik Peiris, J. S. Use of ex vivo and  
813 in vitro cultures of the human respiratory tract to study the tropism and host  
814 responses of highly pathogenic avian influenza A (H5N1) and other influenza  
815 viruses. *Virus Res* **178**, 133-145, doi:10.1016/j.virusres.2013.03.003 (2013).
- 816 13 Takayama, K. In Vitro and Animal Models for SARS-CoV-2 research. *Trends*  
817 *Pharmacol Sci* **41**, 513-517, doi:10.1016/j.tips.2020.05.005 (2020).
- 818 14 Stojdl, D. F. *et al.* VSV strains with defects in their ability to shutdown innate  
819 immunity are potent systemic anti-cancer agents. *Cancer Cell* **4**, 263-275,  
820 doi:10.1016/s1535-6108(03)00241-1 (2003).
- 821 15 Ainslie, G. R. *et al.* Microphysiological lung models to evaluate the safety of new  
822 pharmaceutical modalities: a biopharmaceutical perspective. *Lab Chip*,  
823 doi:10.1039/c9lc00492k (2019).
- 824 16 Benam, K. H. *et al.* Small airway-on-a-chip enables analysis of human lung  
825 inflammation and drug responses in vitro. *Nat Methods* **13**, 151-157,  
826 doi:10.1038/nmeth.3697 (2016).
- 827 17 Yaghi, A. & Dolovich, M. B. Airway Epithelial Cell Cilia and Obstructive Lung  
828 Disease. *Cells* **5**, doi:10.3390/cells5040040 (2016).
- 829 18 Hoffmann, M. *et al.* SARS-CoV-2 Cell Entry Depends on ACE2 and TMPRSS2  
830 and Is Blocked by a Clinically Proven Protease Inhibitor. *Cell* **181**, 271-280 e278,  
831 doi:10.1016/j.cell.2020.02.052 (2020).
- 832 19 Sungnak, W. *et al.* SARS-CoV-2 entry factors are highly expressed in nasal  
833 epithelial cells together with innate immune genes. *Nat Med* **26**, 681-687,  
834 doi:10.1038/s41591-020-0868-6 (2020).

- 835 20 Armstrong, S. M., Mubareka, S. & Lee, W. L. The lung microvascular  
836 endothelium as a therapeutic target in severe influenza. *Antiviral Res* **99**, 113-  
837 118, doi:10.1016/j.antiviral.2013.05.003 (2013).
- 838 21 Cheung, C. Y. *et al.* Induction of proinflammatory cytokines in human  
839 macrophages by influenza A (H5N1) viruses: a mechanism for the unusual  
840 severity of human disease? *Lancet* **360**, 1831-1837 (2002).
- 841 22 Papayannopoulos, V. Neutrophil extracellular traps in immunity and disease. *Nat*  
842 *Rev Immunol* **18**, 134-147, doi:10.1038/nri.2017.105 (2018).
- 843 23 Nicholson, K. G. *et al.* Efficacy and safety of oseltamivir in treatment of acute  
844 influenza: a randomised controlled trial. Neuraminidase Inhibitor Flu Treatment  
845 Investigator Group. *Lancet* **355**, 1845-1850, doi:10.1016/s0140-6736(00)02288-1  
846 (2000).
- 847 24 Zhou, J. *et al.* Differentiated human airway organoids to assess infectivity of  
848 emerging influenza virus. *Proc Natl Acad Sci U S A* **115**, 6822-6827,  
849 doi:10.1073/pnas.1806308115 (2018).
- 850 25 Laporte, M. & Naesens, L. Airway proteases: an emerging drug target for  
851 influenza and other respiratory virus infections. *Curr Opin Virol* **24**, 16-24,  
852 doi:10.1016/j.coviro.2017.03.018 (2017).
- 853 26 Simonson, W. Influenza treatment with antiviral medications. *Geriatr Nurs* **40**, 99-  
854 100, doi:10.1016/j.gerinurse.2018.12.007 (2019).
- 855 27 Si, L. *et al.* Triterpenoids manipulate a broad range of virus-host fusion via  
856 wrapping the HR2 domain prevalent in viral envelopes. *Sci Adv* **4**, eaau8408,  
857 doi:10.1126/sciadv.aau8408 (2018).

- 858 28 Wu, F. *et al.* A new coronavirus associated with human respiratory disease in  
859 China. *Nature* **579**, 265-269, doi:10.1038/s41586-020-2008-3 (2020).
- 860 29 Letko, M., Marzi, A. & Munster, V. Functional assessment of cell entry and  
861 receptor usage for SARS-CoV-2 and other lineage B betacoronaviruses. *Nat*  
862 *Microbiol* **5**, 562-569, doi:10.1038/s41564-020-0688-y (2020).
- 863 30 Ou, X. *et al.* Characterization of spike glycoprotein of SARS-CoV-2 on virus entry  
864 and its immune cross-reactivity with SARS-CoV. *Nat Commun* **11**, 1620,  
865 doi:10.1038/s41467-020-15562-9 (2020).
- 866 31 Johansen, L. M. *et al.* FDA-approved selective estrogen receptor modulators  
867 inhibit Ebola virus infection. *Sci Transl Med* **5**, 190ra179,  
868 doi:10.1126/scitranslmed.3005471 (2013).
- 869 32 Johansen, L. M. *et al.* A screen of approved drugs and molecular probes  
870 identifies therapeutics with anti-Ebola virus activity. *Sci Transl Med* **7**, 290ra289,  
871 doi:10.1126/scitranslmed.aaa5597 (2015).
- 872 33 Zhao, Y. *et al.* Toremifene interacts with and destabilizes the Ebola virus  
873 glycoprotein. *Nature* **535**, 169-172, doi:10.1038/nature18615 (2016).
- 874 34 Hattermann, K. *et al.* Susceptibility of different eukaryotic cell lines to SARS-  
875 coronavirus. *Arch Virol* **150**, 1023-1031, doi:10.1007/s00705-004-0461-1 (2005).
- 876 35 Matsuyama, S. *et al.* Enhanced isolation of SARS-CoV-2 by TMPRSS2-  
877 expressing cells. *Proc Natl Acad Sci U S A*, doi:10.1073/pnas.2002589117  
878 (2020).
- 879 36 Chen Jun, L. Y., Xi Xiuhong, Liu Ping, Li Feng, Li Tao, Shang Zhiyin, Wang  
880 Mei, Shen Yinzhou, Lu Hongzhou. Efficacies of lopinavir/ritonavir and abidol in

- 881 the treatment of novel coronavirus pneumonia. *Chin J Infect Dis* **38**, E008-E008,  
882 doi:10.3760/cma.j.cn311365-20200210-00050 (2020).
- 883 37 Orrell, C. *et al.* Pharmacokinetics and tolerability of artesunate and amodiaquine  
884 alone and in combination in healthy volunteers. *Eur J Clin Pharmacol* **64**, 683-  
885 690, doi:10.1007/s00228-007-0452-8 (2008).
- 886 38 Ingber, D. E. Is it time for reviewer 3 to request human organ chip experiments  
887 instead of animal validation studies? *Advanced Science*, doi:In Press (2020).
- 888 39 Marx, U. *et al.* Biology-inspired microphysiological systems to advance patient  
889 benefit and animal welfare in drug development. *ALTEX*,  
890 doi:10.14573/altex.2001241 (2020).
- 891 40 Li, Y. *et al.* Efficacy and safety of lopinavir/ritonavir or arbidol in adult patients  
892 with mild/moderate COVID-19: an exploratory randomized controlled trial. *Med*,  
893 doi:10.1016/j.medj.2020.04.001.
- 894 41 Jeon, S. *et al.* Identification of antiviral drug candidates against SARS-CoV-2  
895 from FDA-approved drugs. *Antimicrob Agents Chemother*,  
896 doi:10.1128/AAC.00819-20 (2020).
- 897 42 Weston, S., Haupt, R., Logue, J., Matthews, K. & Frieman, M. B. FDA approved  
898 drugs with broad anti-coronaviral activity inhibit SARS-CoV-2 *in vitro*.  
899 *bioRxiv*, 2020.2003.2025.008482, doi:10.1101/2020.03.25.008482 (2020).
- 900 43 DeWald, L. E. *et al.* In Vivo Activity of Amodiaquine against Ebola Virus Infection.  
901 *Sci Rep* **9**, 20199, doi:10.1038/s41598-019-56481-0 (2019).
- 902 44 Sinou, V. *et al.* Pharmacokinetics and pharmacodynamics of a new ACT  
903 formulation: Artesunate/Amodiaquine (TRIMALACT) following oral administration

904 in African malaria patients. *Eur J Drug Metab Pharmacokinet* **34**, 133-142,  
905 doi:10.1007/BF03191163 (2009).

906 45 Gignoux, E. *et al.* Effect of Artesunate-Amodiaquine on Mortality Related to  
907 Ebola Virus Disease. *N Engl J Med* **374**, 23-32, doi:10.1056/NEJMoa1504605  
908 (2016).

909 46 CDC. International Notes Agranulocytosis Associated with the Use of  
910 Amodiaquine for Malaria Prophylaxis. *MMWR* **35**, 165-166 (1986).

911 47 Hou, Y. J. *et al.* SARS-CoV-2 Reverse Genetics Reveals a Variable Infection  
912 Gradient in the Respiratory Tract. *Cell* **182**, 429-446 e414,  
913 doi:10.1016/j.cell.2020.05.042 (2020).

914 48 Blanco-Melo, D. *et al.* Imbalanced Host Response to SARS-CoV-2 Drives  
915 Development of COVID-19. *Cell* **181**, 1036-1045 e1039,  
916 doi:10.1016/j.cell.2020.04.026 (2020).

917

918



919

## FIGURE LEGENDS

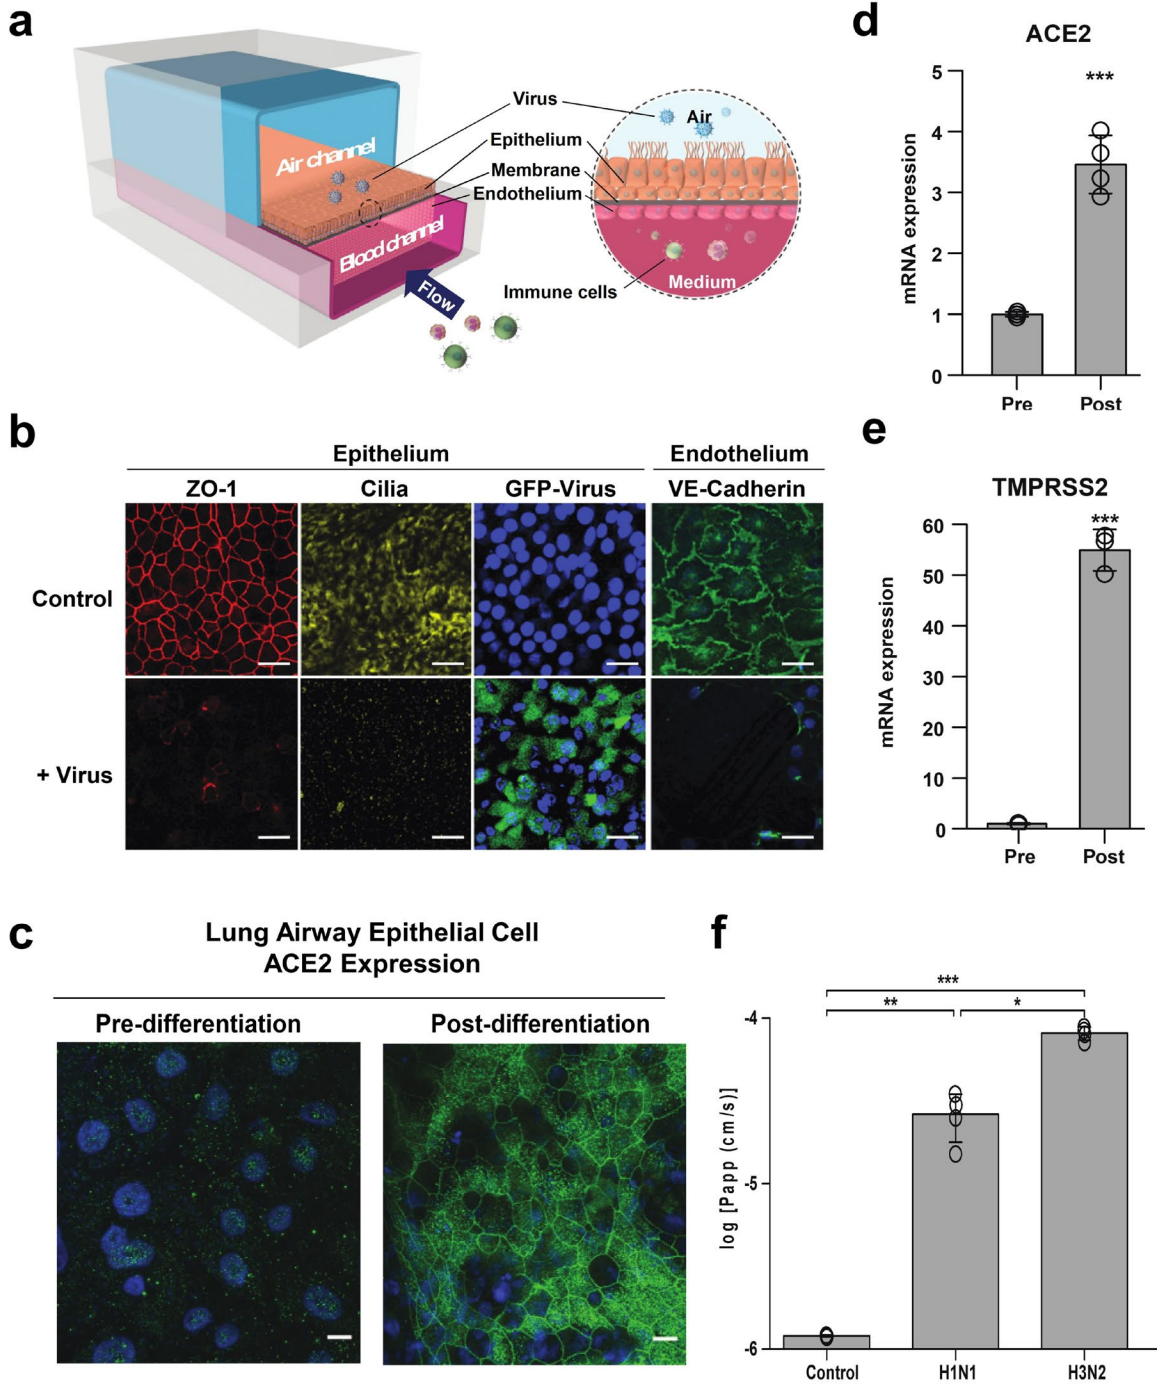

920

921

922

923

**Fig. 1. Characterization of the human Airway Chip and its infection with influenza virus.** (a) Schematic diagram of a cross-section through the Airway Chip. (b) Immunofluorescence micrographs showing the distribution of ZO1-containing tight

924 junctions and cilia in the epithelium and VE-cadherin-containing adherens junctions in  
925 the endothelium of the Airway Chip in the absence (Control) or presence (+ Virus) of  
926 infection with GFP-labeled influenza PR8 (H1N1) virus (MOI = 0.1) for 48 h (blue, DAPI-  
927 stained nuclei; bar, 50  $\mu$ m). **(c-e)** Immunofluorescence micrographs showing the  
928 expression of ACE2 receptor **(c)** and fold changes in mRNA levels of ACE2 **(d)** and  
929 TMPRSS2 **(e)** in the well-differentiated primary human lung airway epithelium on-chip  
930 (Post) versus the same cells prior to differentiation (Pre). **(f)** Increase in barrier  
931 permeability as measured by apparent permeability ( $\log P_{app}$ ) within the human Airway  
932 chip 48 h post-infection with PR8 (H1N1) or HK/68 (H3N2) virus (MOI = 0.1) compared  
933 to no infection (Control).  
934

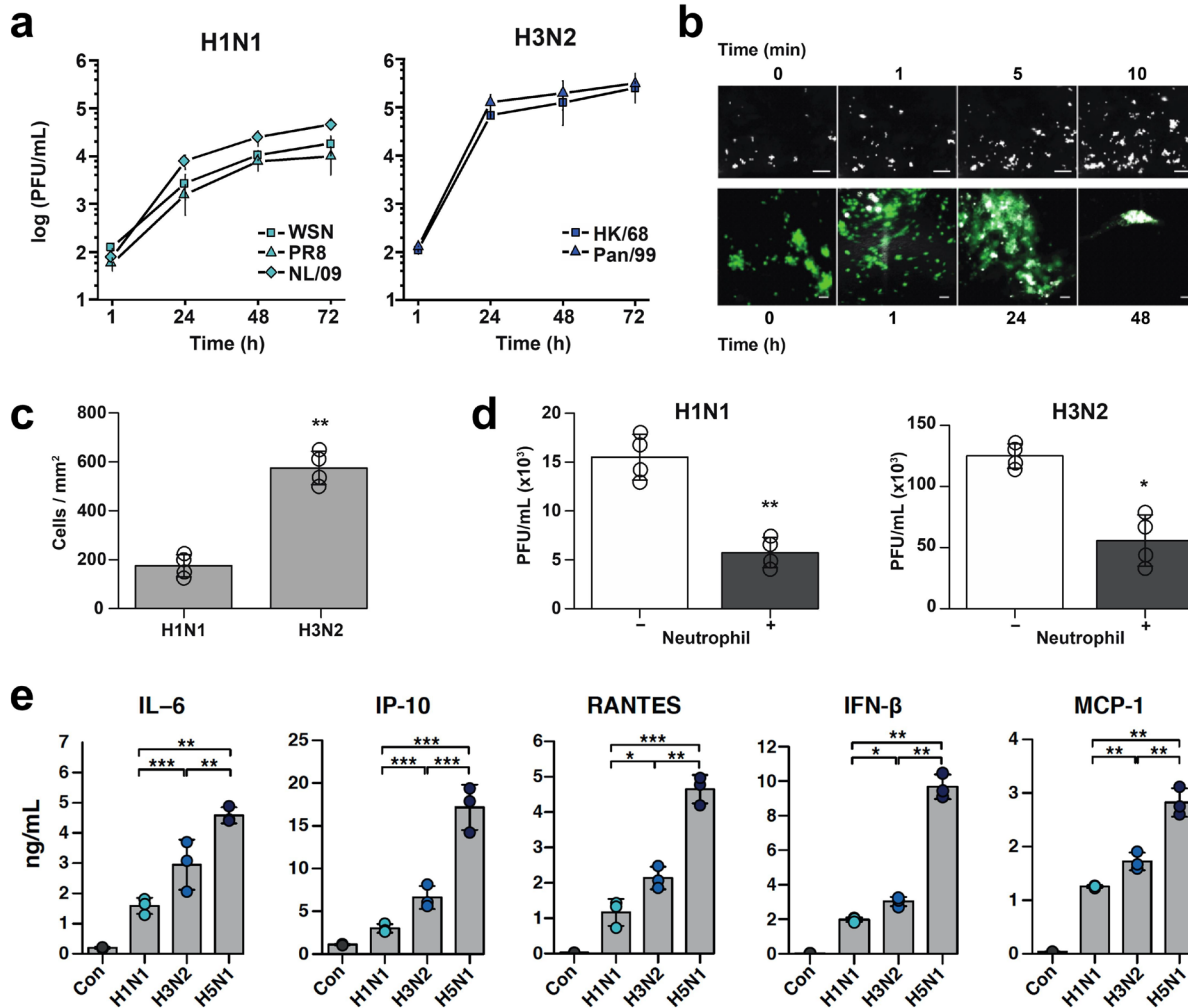

935

936

937

938

939

940

941

942

943

944

**Fig. 2. Infection with multiple influenza strains in human Airway Chips and resultant immune responses.** (a) Replication kinetics of influenza H1N1 virus strains WSN (square), PR8 (triangle), NL/09 (diamond) (left graph), and of influenza H3N2 virus strains HK/68 (square) and Pan/99 (triangle) (right graph), when infected at MOI = 0.001 in human Airway Chips. (b) Neutrophil responses to influenza infection in human lung Airway Chip. Top, sequential immunofluorescence micrographs showing time-dependent recruitment of neutrophils (white) to the apical surface of the endothelium (unlabeled) within a human Airway Chip infected with influenza PR8 (H1N1) virus (bar, 50 μm). Bottom, immunofluorescence micrographs showing time-dependent recruitment of neutrophils (white) to the apical surface of the endothelium (unlabeled) within a human Airway Chip infected with influenza PR8 (H1N1) virus (bar, 50 μm). (c) Bar graph showing cell counts per mm<sup>2</sup> for H1N1 and H3N2. (d) Bar graphs showing PFU/mL for H1N1 and H3N2 with and without neutrophils. (e) Bar graphs showing cytokine levels (ng/mL) for IL-6, IP-10, RANTES, IFN-β, and MCP-1 across Con, H1N1, H3N2, and H5N1 conditions.

**Confidential**

945 of neutrophils (white) to the epithelium (unlabeled) and clearance of clustered epithelial  
946 cells infected with GFP-labeled PR8 (H1N1) virus (green) (bar, 50  $\mu$ m). (c) Graph  
947 showing numbers of neutrophils recruited to the epithelium in response to infection by  
948 H1N1 or H3N2. (d) Virus titers of human Airway Chips infected with WSN (H1N1) or  
949 HK/68 (H3N2) in the presence (+) or absence (-) of added neutrophils (PFU, plaque-  
950 forming units). (e) Production of indicated cytokines and chemokines in the human  
951 Airway chip at 48 h post-infection with different clinically isolated influenza virus strains,  
952 including NL/09 (H1N1), Pan/99 (H3N2), and HK/97 (H5N1) (MOI = 0.1). \*, P<0.05; \*\*,  
953 P<0.01; \*\*\*, P<0.001.

954

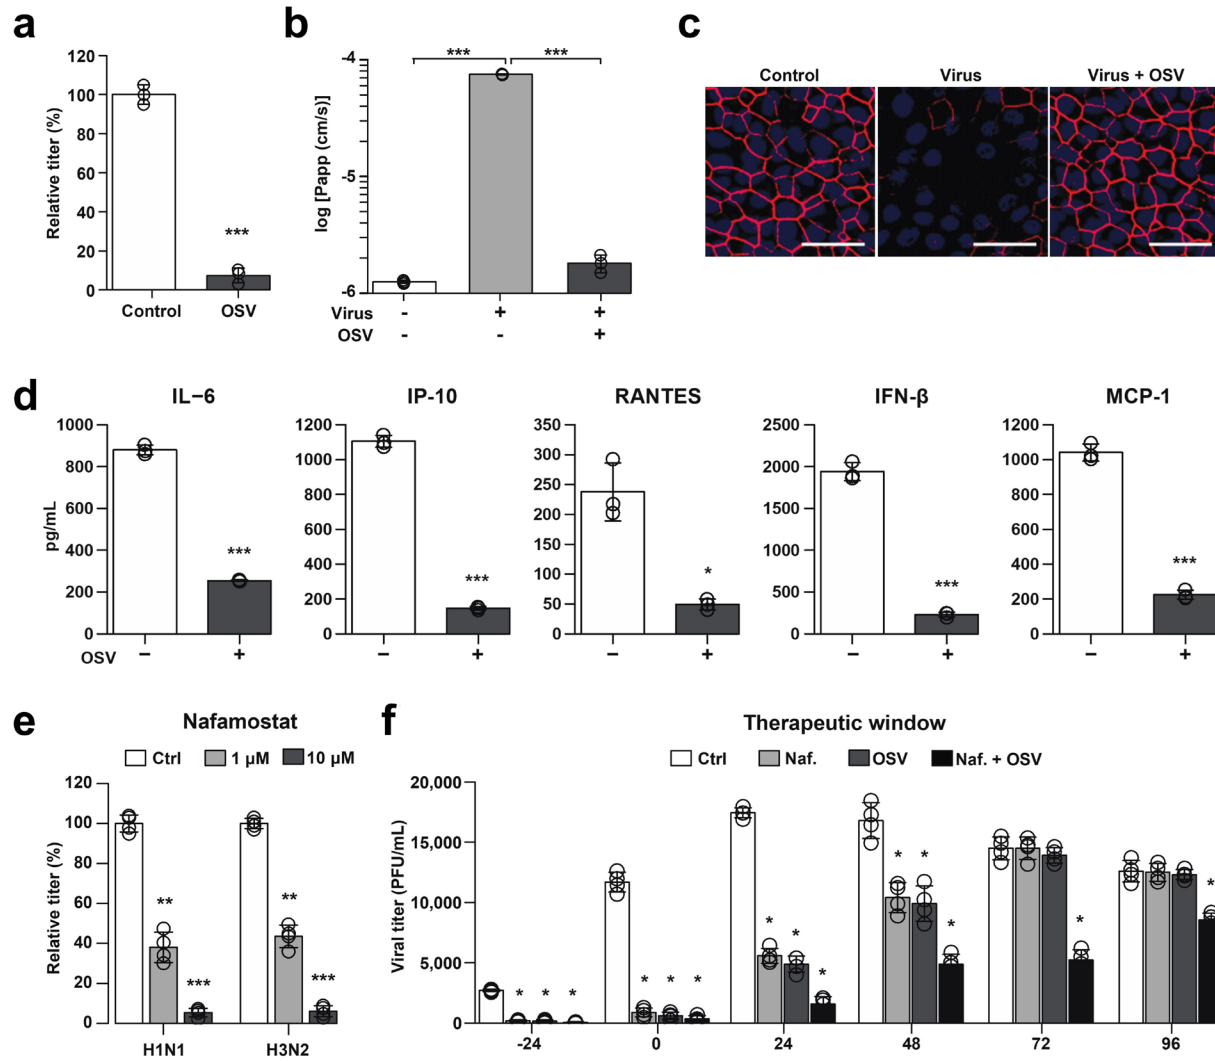

955

956

957

958

959

960

961

962

963

**Fig. 3. Effects of anti-influenza therapeutics in the human Airway Chip. (a)**

Graph showing relative plaque titers of progeny virus in the absence (Ctrl) or presence

of 1 μM oseltamivir acid (OSV) 48 h post-infection with WSN (H1N1; MOI = 0.1). **(b)**

Barrier permeability (log P<sub>app</sub>) measured under control conditions within the human

Airway Chip (- Virus) or 48 h post-infection with WSN (+ Virus) with (+) or without (-)

OSV. **(c)** Immunofluorescence micrographs showing the distribution of ZO1-containing

tight junctions in airway epithelium under baseline conditions (Ctrl) or infected with WSN

alone (Virus) or in the presence of OSV (Virus + OSV) 48 h post-infection (bar, 50 μm).

**Confidential**

964 (d) Production of cytokines in human Airway Chip 48 h post-infection with WSN in the  
965 presence (+) or absence (-) of OSV. (e) Virus titer detection showing the effects of  
966 Nafamostat at 1  $\mu$ M (grey bars) or 10  $\mu$ M (white bars) dose on virus replication of H1N1  
967 and H3N2 in Airway chips 48 h post-infection compared to untreated chips (Ctrl, black  
968 bars). (f) The effects of Nafamostat, oseltamivir and their combination on relative viral  
969 titers when added to H1N1 virus-infected human Airway Chips at indicated times; note  
970 the synergistic effects of these two drugs at later times. \*,  $P < 0.05$ ; \*\*,  $P < 0.01$ ; \*\*\*,  
971  $P < 0.001$ .

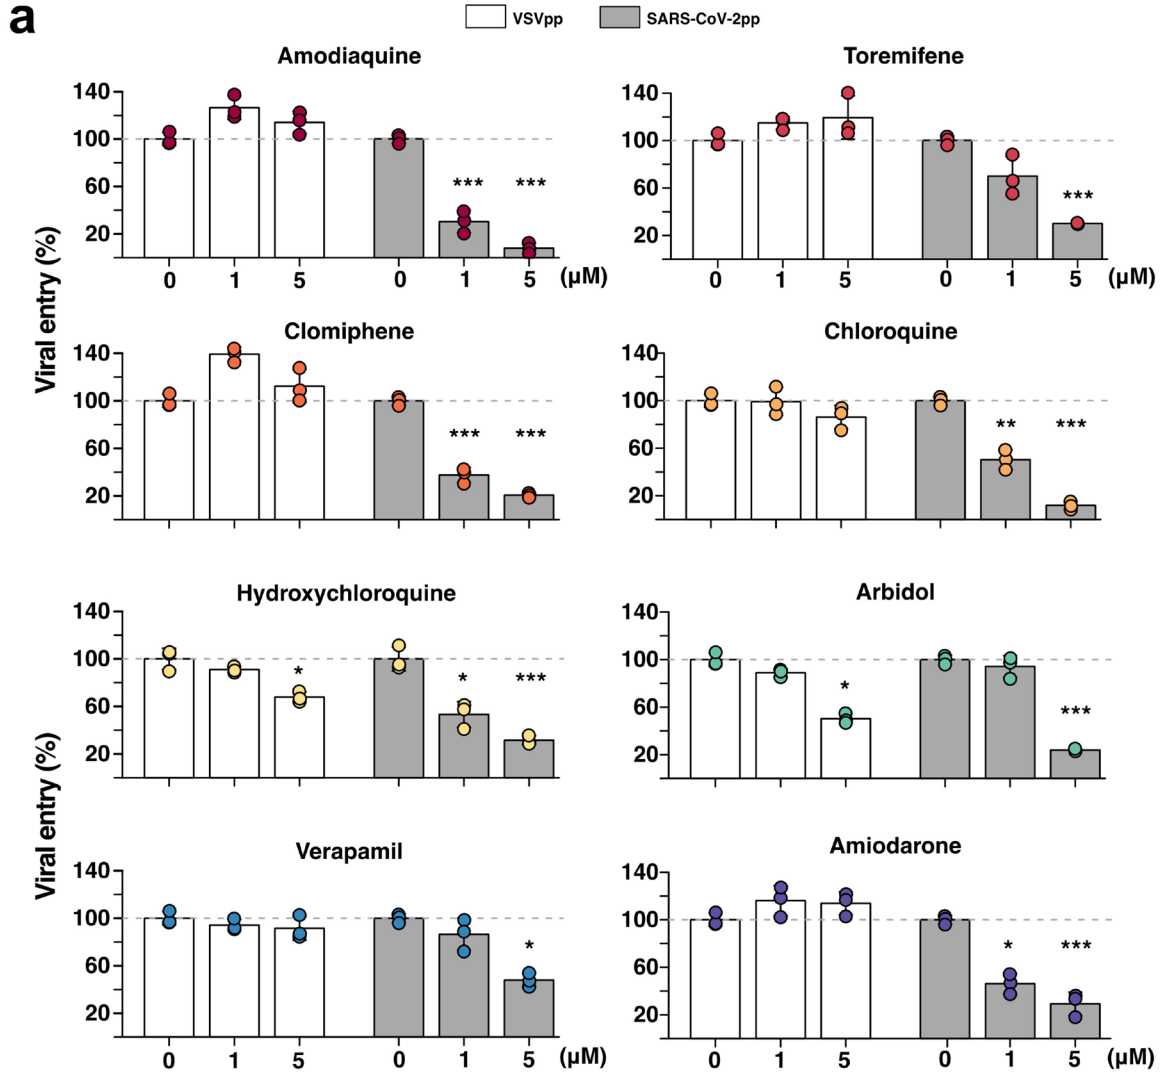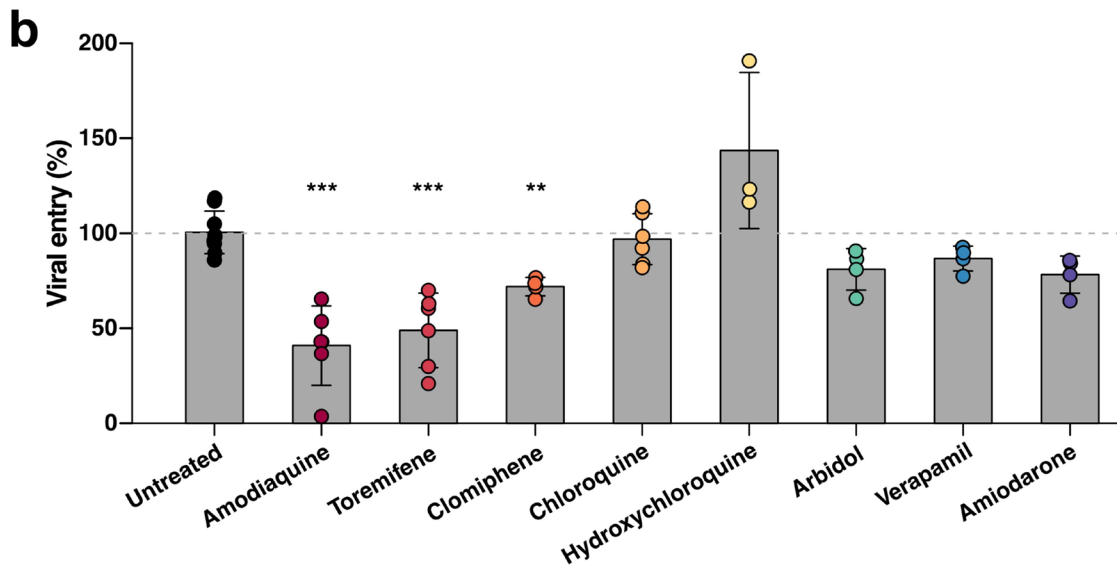

973 **Fig. 4. Effects of FDA-approved drugs on pseudotyped SARS-CoV-2 viral**  
974 **entry in Huh-7 cells versus human Airway Chips. (a)** Graphs showing the inhibitory  
975 effects of amodiaquine, toremifene, clomiphene, chloroquine, hydroxychloroquine,  
976 arbidol, verapamil, and amiodarone when added at 0, 1, or 5  $\mu$ M to Huh-7 cells infected  
977 with SARS-CoV-2pp for 72 h (grey bars). The number of pseudoparticles in the infected  
978 cells was quantified by measuring luciferase activity; viral entry in untreated cells was  
979 set as 100%. VSVpp were tested in parallel to exclude toxic and nonspecific effects of  
980 the drugs tested (white bars). **(b)** The efficacy of the same drugs in human Airway Chips  
981 infected with SARS-CoV-2pp. Amodiaquine, toremifene, clomiphene, chloroquine,  
982 hydroxychloroquine, arbidol, verapamil, and amiodarone were delivered into apical and  
983 basal channels of the chip at their respective  $C_{max}$  in human blood, and one day later  
984 chips were infected with SARS-CoV-2pp while in the continued presence of the drugs  
985 for 2 more days. The epithelium from the chips were collected for detection of viral pol  
986 gene by qRT-PCR; viral entry in untreated chips was set as 100%. \*,  $P < 0.05$ ; \*\*,  $P <$   
987  $0.01$ ; \*\*\*,  $P < 0.001$ .



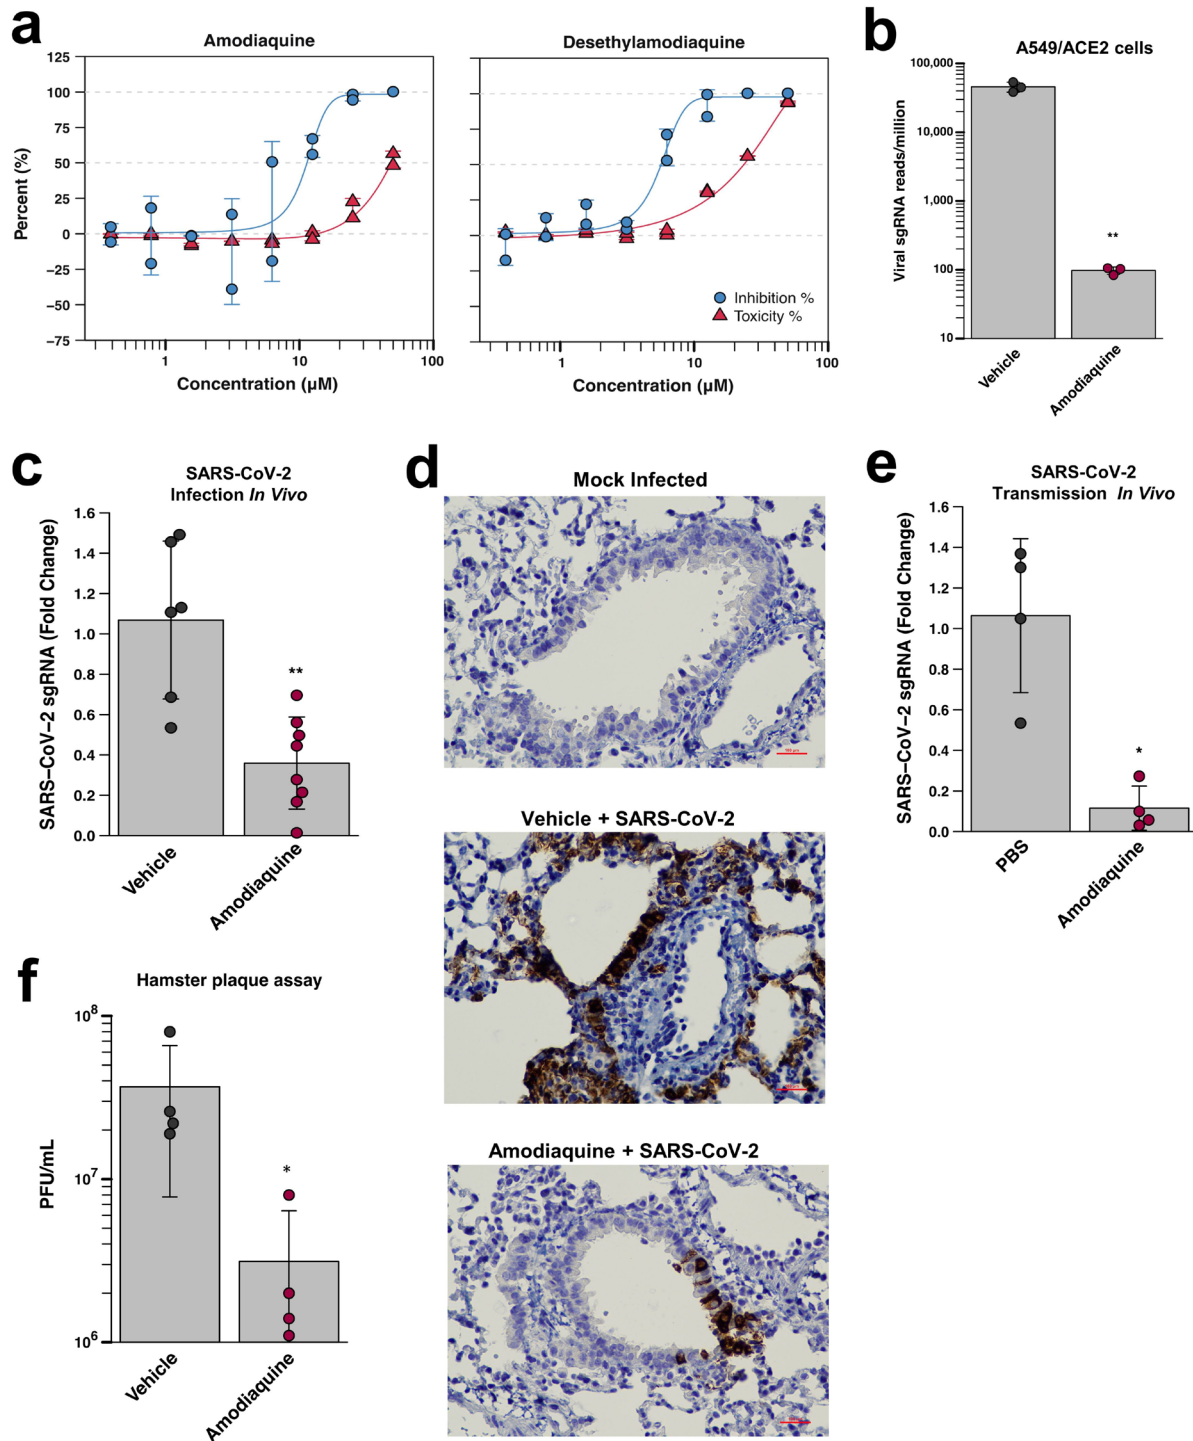

988

989

990

991

**Fig. 5. Inhibition of infection by native SARS-CoV-2 virus *in vitro* and *in vivo*.**

(a) Dose-response curves for amodiaquine and its metabolite desethylamodiaquine demonstrating their ability to inhibit GFP-SARS-CoV-2 infection (MOI = 0.1) in a dose-

992 dependent manner in Vero E6 cells. (b) Inhibition of wild type SARS-CoV-2 infection in  
993 ACE2-expressing A549 cells by 10  $\mu$ M amodiaquine. (c) Reduction of viral load in the  
994 lungs of hamsters treated once a day with amodiaquine (50 mg/kg) beginning 1 day  
995 prior to intranasal administration of SARS-CoV-2 virus ( $10^3$  PFU) as measured by qPCR  
996 for subgenomic RNA encoding SARS-CoV-2 N protein. \*\*,  $p < 0.01$ . (d) Hematoxylin-  
997 and SARS-CoV-2 N-stained histological sections of lungs from animals that were mock  
998 treated, infected with SARS-CoV-2 and treated with vehicle alone, or infected with  
999 SARS-CoV-2 and treated with amodiaquine (50 mg/kg subcutaneously). (e) Reduction  
1000 of viral load in the lungs of hamsters treated once a day for 4 days with amodiaquine  
1001 (50 mg/kg) beginning 1 day prior to co-caging with SARS-CoV-2 infected animals as  
1002 measured by qPCR for RNA encoding SARS-CoV-2 N protein. \*,  $p < 0.05$ . (f) Graph  
1003 depicting plaque forming units (PFU) per mL of lung homogenate from hamsters  
1004 pretreated with vehicle or amodiaquine one day prior to being exposed to infected  
1005 animals. Each cohort was comprised of 4 animals;  $p$ -value = 0.037.

1006

1007 **Table 1. Clinically relevant drug concentrations used in human Airway Chips.**

| <b>Drug</b>                | <b>C<sub>max</sub> (ng/ml)</b>     | <b>C<sub>max</sub> (<math>\mu</math>M)</b> |
|----------------------------|------------------------------------|--------------------------------------------|
| <b>Amodiaquine</b>         | <b>575</b>                         | <b>1.24</b>                                |
| <b>Toremifene</b>          | <b>1211</b>                        | <b>2.98</b>                                |
| <b>Clomiphene</b>          | <b>500</b>                         | <b>0.83</b>                                |
| <b>Chloroquine</b>         | <b>960.5</b>                       | <b>1.91</b>                                |
| <b>Hydroxychloroquine</b>  | <b>422</b>                         | <b>1.25</b>                                |
| <b>Arbidol</b>             | <b>2160</b>                        | <b>3.89</b>                                |
| <b>Verapamil</b>           | <b>287 <math>\pm</math> 105</b>    | <b>0.81</b>                                |
| <b>Amiodarone</b>          | <b>13660 <math>\pm</math> 3410</b> | <b>20.04</b>                               |
| <b>Desethylamodiaquine</b> | <b>329-828</b>                     | <b>1.00</b>                                |

1008

1009

## EXTENDED DATA FIGURE LEGENDS

**a**

| Cell type         | Current Airway Chip | Human Airway | Published Airway Chip |
|-------------------|---------------------|--------------|-----------------------|
| Ciliated cell (%) | ~60-80              | ~50-70       | ~20-30                |
| Goblet cell (%)   | ~10-15              | ~10-15       | ~10-20                |
| Club cell (%)     | ~15-20              | ~11-44       | ~25                   |
| Basal cell (%)    | ~10-20              | ~6-30        | ~20                   |

**b**

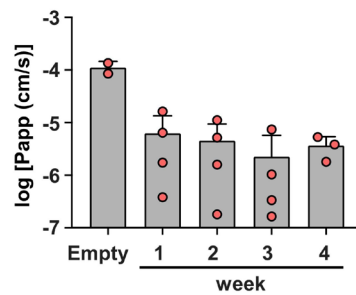

**c**

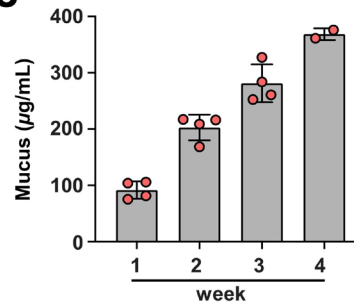

**d**

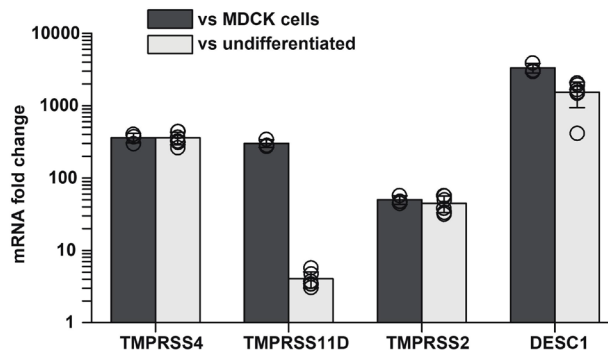

1010

1011

**Extended Data Fig. 1. Characterization of human Airway Chip. (a)** Comparison

1012

of the percentage of different lung epithelial cell types in the human Airway Chip

1013

presented here compared with those found in living human airway and in our previously

1014

published Airway Chip created using a membrane with smaller pores<sup>6,7</sup>. **(b)** Barrier

1015

permeability (log P<sub>app</sub>) of the human Airway Chip assessed using Cascade blue (607

1016

Da) as fluorescent tracer at 1 to 4 weeks of differentiation under an ALI compared with

1017

chips without cells (Empty). **(c)** Mucus production at week 1, 2, 3, and 4 post-

**Confidential**

1018 differentiation quantified using an Alcian Blue assay. (d) Fold changes in gene  
1019 expression levels of 4 different epithelial cell serine proteases (TMPRSS4,  
1020 TMPRSS11D, TMPRSS2, DESC1) in the well-differentiated Airway Chip versus MDCK  
1021 cells (one of the most commonly used cell lines in influenza studies) or undifferentiated  
1022 primary human lung airway epithelial cells.

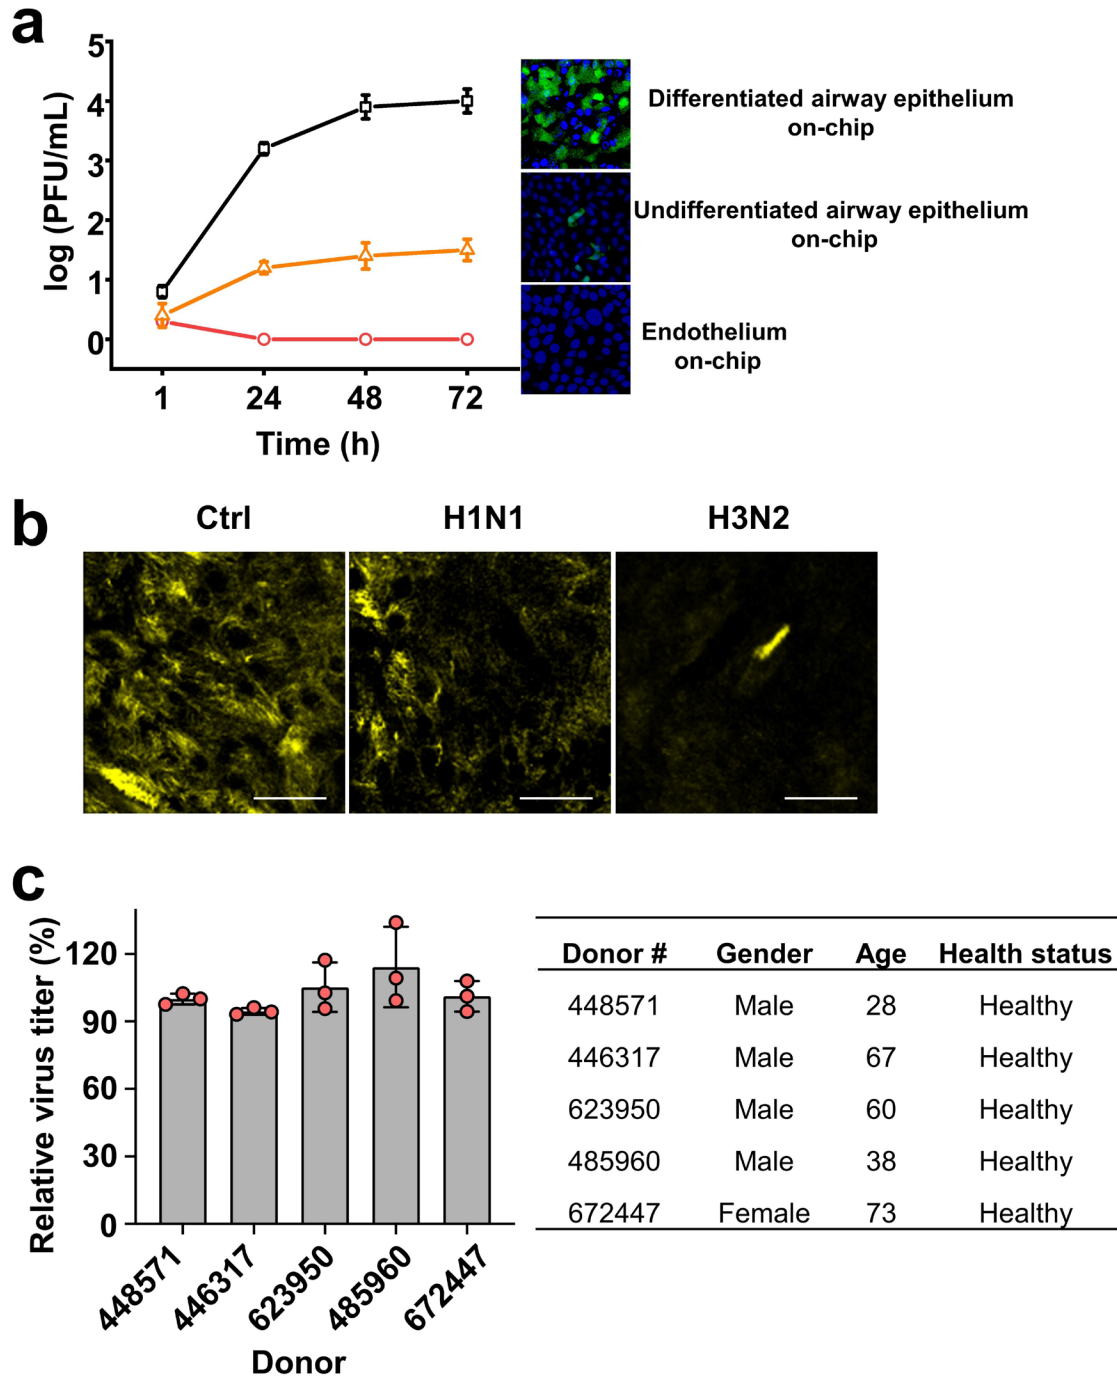

1023

1024

1025

1026

1027

**Extended Data Fig. 2.** (a) Comparison of infectivity and replication of GFP-labeled PR8 (H1N1) in the differentiated epithelium of human lung Airway chip, undifferentiated airway epithelium on-chip, and human vascular endothelium on-chip. Graph showing replication kinetics of influenza PR8 (H1N1) virus (MOI = 0.001) in differentiated

1028 epithelium of human Airway Chip, undifferentiated epithelium on-chip, and human  
1029 vascular endothelium on-chip (left) and corresponding immunofluorescence  
1030 micrographs showing the infection of GFP-labeled PR8 (H1N1) virus (MOI = 0.1) in  
1031 these respective chips at 48 h post-infection (green, cells expressing GFP-labeled virus;  
1032 blue, DAPI-stained nuclei). **(b)** Immunofluorescence micrographs showing apical cilia 24  
1033 h post-infection with PR8 (H1N1) or HK/68 (H3N2) (MOI = 0.1) compared to untreated  
1034 chips (Ctrl). **(c)** Characterization of the replication competence of influenza virus in  
1035 human lung Airway Chips created with lung airway epithelial basal stem cells obtained  
1036 from 5 different healthy donors. Influenza PR8 (H1N1) virus was used to infect human  
1037 Airway chips (MOI = 0.1), and progeny viruses were collected for viral titers detection 48  
1038 h later. Information on the donors is shown in the table at the right.  
1039

1040

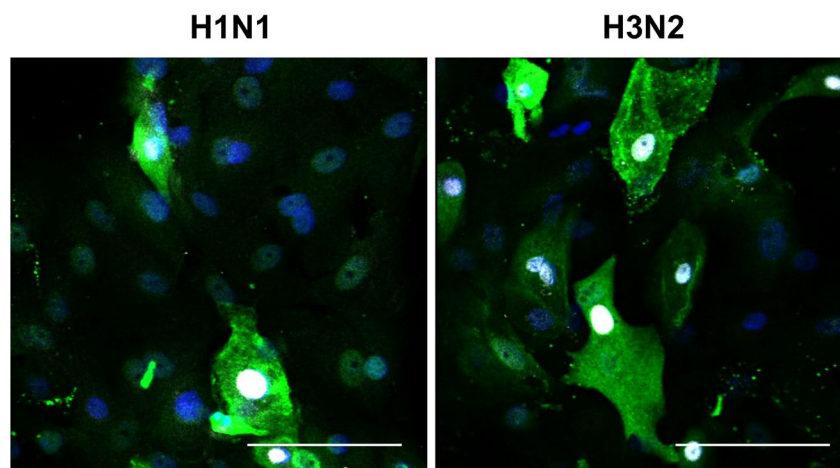

1041

1042 **Extended Data Fig. 3.** Higher magnification immunofluorescence micrographs  
1043 showing specific binding of neutrophils (white) to cells infected by WSN (H1N1) or  
1044 HK/68 (H3N2), which are stained for viral NP (green) (bar, 50  $\mu$ m).

1045

1046

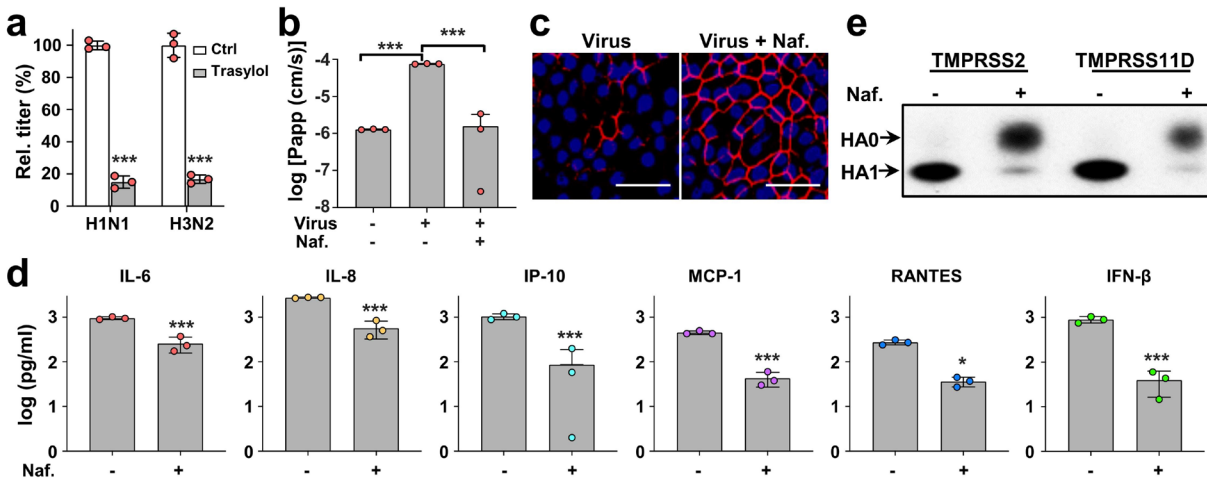

1047

1048

**Extended Data Fig. 4. Characterization of FDA-approved protease inhibitor**

1049

**drugs as anti-influenza therapeutics in the human lung Airway Chip. (a)** Virus titer

1050

detection showing the effects of Trasyolol (aprotinin) on virus replication of H1N1 and

1051

H3N2 in Airway chips 48 h post-infection (Trasyolol, gray bars) compared to untreated

1052

chips (Ctrl, white bars). **(b)** Barrier permeability (log  $P_{app}$ ) within human Airway Chips

1053

measured 48 h post-infection with H1N1 (MOI = 0.1) (+ Virus) in the presence (+) or

1054

absence (-) of 10  $\mu$ M Nafamostat (Naf.) compared to uninfected chips (- Virus). **(c)**

1055

Immunofluorescence micrographs showing preservation of ZO1-containing tight

1056

junctions seen that are lost in airway epithelium 48 h after infection with H1N1 (MOI =

1057

0.1) (Virus) when treated with 10  $\mu$ M Nafamostat (Virus + Naf.) (bar, 50  $\mu$ m). **(d)**

1058

Production of various influenza-associated cytokines and chemokines in the human

1059

Airway Chip in the presence (+) or absence (-) of 10  $\mu$ M Nafamostat (Naf.), which

1060

suppresses the cytokine response. **(e)** Western blots showing inhibition of TMPRSS2-

1061

and TMPRSS11D-mediated cleavage of influenza virus HA0 to HA1 by 10  $\mu$ M

1062

Nafamostat (Naf.).



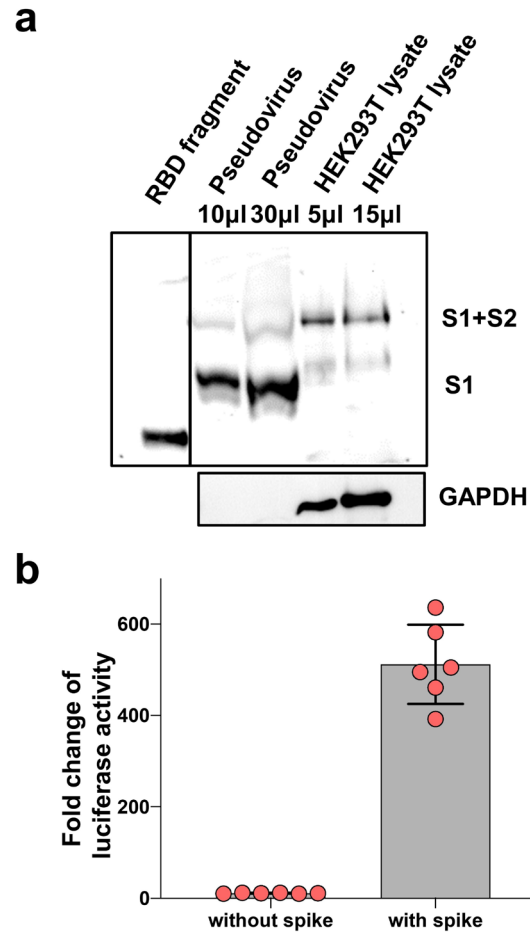

1063

1064

**Extended Data Fig. 5. Characterization of the SARS-CoV-2pp and their entry**

1065

**into Huh-7 cells.** (a) Western blot analysis of SARS-CoV-2 S protein in the lysate of the

1066

HEK293T packaging cell line and in pseudotyped virions in the supernatant showing

1067

that both uncleaved full-length (S1+S2; ~180 kDa) and cleaved forms (~90 kDa) of the

1068

spike protein are present in the virions. A recombinant protein containing the receptor

1069

binding region domain from S1 (RBD fragment) was used as a positive control, and

1070

results were compared to cellular GAPDH. (b) Huh-7 cells were infected with SARS-

1071

CoV-2pp for 72 h. Luciferase activity was measured to estimate the number of

1072

pseudoparticles in the host cells; pseudoparticles without SARS-CoV-2 spike protein

1073

were used as control.

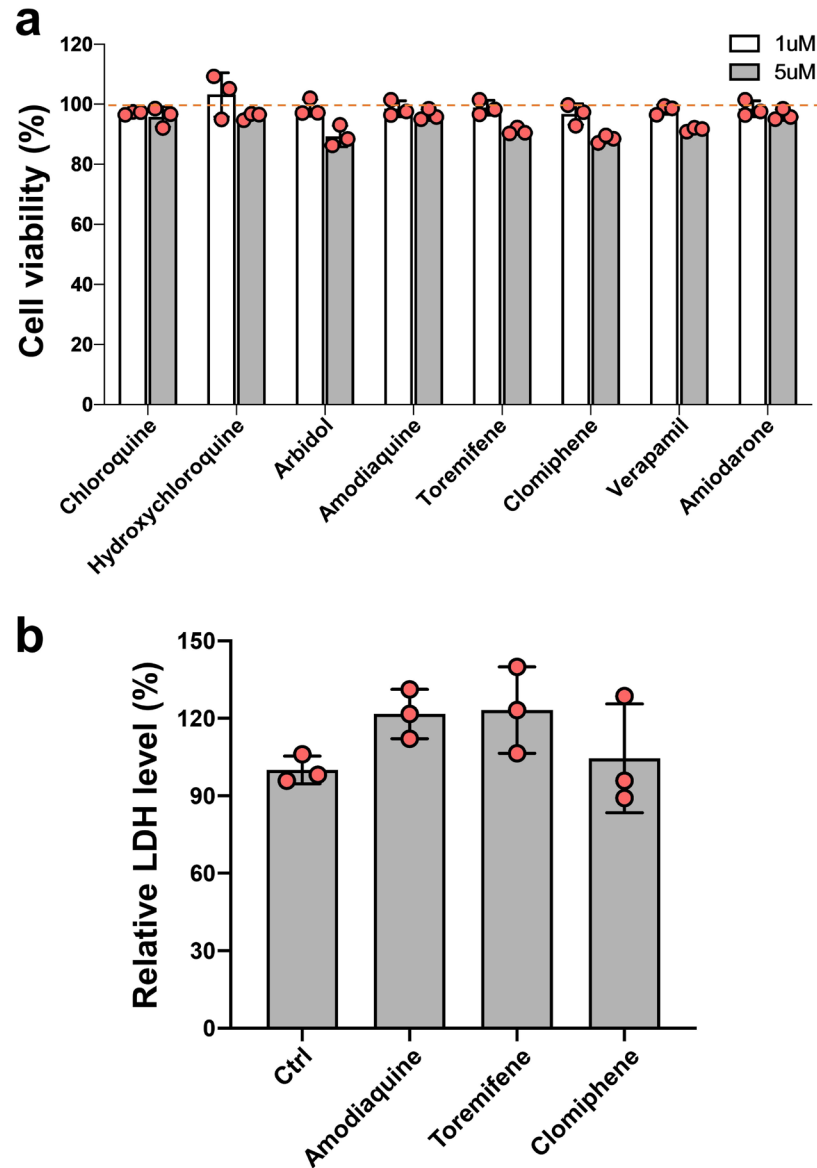

1074

1075

**Extended Data Fig. 6. Evaluation of the cytotoxicity of test drugs in Huh-7**

1076

**cells and human Airway chips. (a)** Huh-7 cells were treated with the test drugs at 1 or

1077

5  $\mu$ M for 48 h, and cell viability was measured by Celltiter-Glo assay. The cell viability of

1078

untreated cells was set as 100%. **(b)** Human Airway Chips were treated with the test

1079

drugs at their respective Cmax for 72 h, cell damage was measure by LDH assay. The

1080

LDH level of untreated human Airway Chips was set as 100%. Note that none of the

1081

drugs produced any significant cytotoxicity at the doses used in these studies.

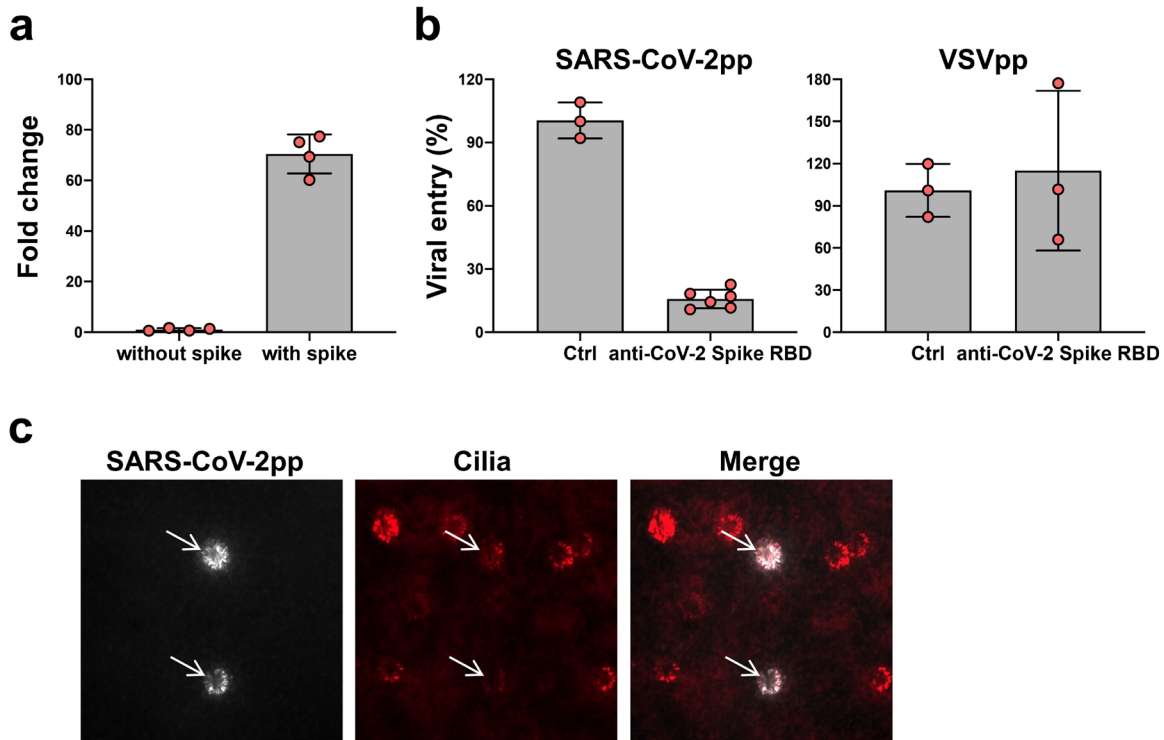

1082

1083

1084

1085

1086

1087

1088

1089

1090

1091

1092

1093

1094

1095

**Extended Data Fig. 7. Characterization of SARS-CoV-2pp infection in human Airway Chips.** (a) SARS-CoV-2 spike protein-mediated infection of CoV-2pp in human Airway Chips. Human Airway Chips were infected with SARS-CoV-2pp for 2 h, washed with PBS, and cultured for 48 h. Cells were collected for detection of viral gene by RT-qPCR. Data are expressed as fold change in viral gene expression relative to control pseudoparticles without SARS-CoV-2 spike protein. (b) The infection of SARS-CoV-2pp was blocked by neutralizing antibody targeting the RBD of spike protein. SARS-CoV-2pp or VSVpp were incubated with neutralizing antibody for 1 h at room temperature before infecting human airway epithelium. 48 h later, cells were collected for detection of viral gene by RT-qPCR. PBS was used as control (Ctrl). (c) Immunofluorescence micrographs showing specific infection of SARS-CoV-2pp (white) in ciliated cells (green).

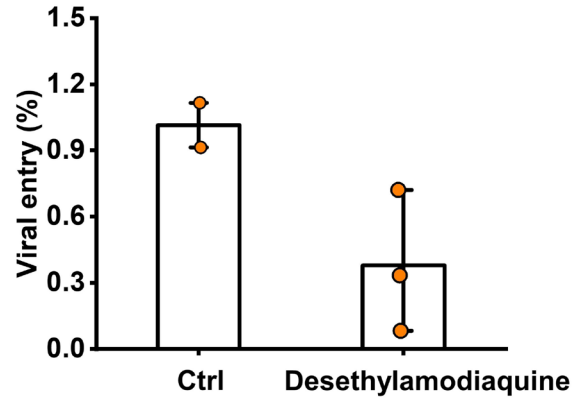

1096

1097

1098

1099

1100

1101

1102

**Extended Data Fig. 8. Effects of desethylamodiaquine on pseudotyped SARS-CoV-2 viral entry in human Airway Chips.** Desethylamodiaquine was delivered into apical and basal channels of the chip at its  $C_{max}$  in human blood (1  $\mu$ M), and one day later chips were infected with SARS-CoV-2pp while in the continued presence of the drugs for 2 days. The epithelium from the chips were collected for detection of viral gene by qRT-PCR; viral entry in untreated chips was set as 100%.

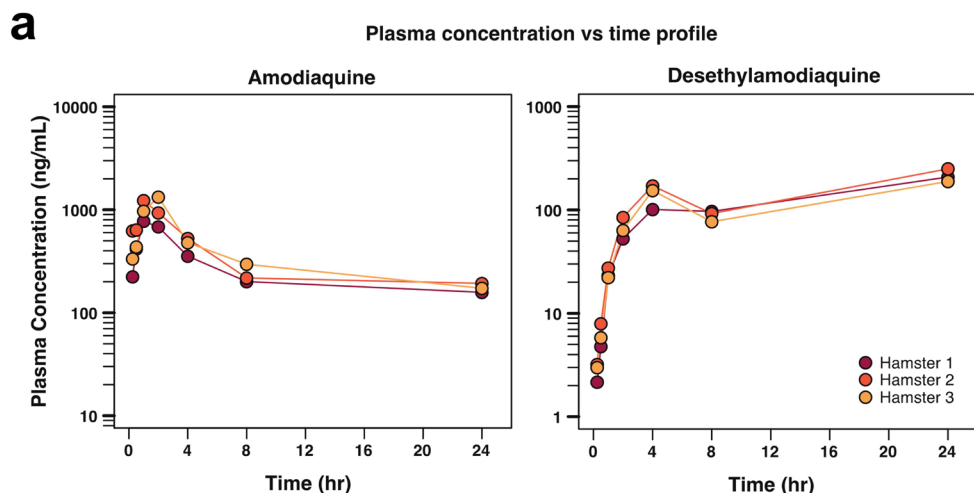

**b**

| PK parameters | Unit      | Amodiaquine        | Desethylamodiaquine |
|---------------|-----------|--------------------|---------------------|
| $T_{1/2}$     | h         | 18.1±2.9           | > 24                |
| $T_{max}$     | h         | 1.3±0.6            | 24.0±0.0            |
| $C_{max}$     | ng/mL(μM) | 1111±296 (3.2±0.8) | 216±31 (0.7±0.1)    |
| $AUC_{last}$  | h*ng/mL   | 7644±1338          | 3161±381            |

**c**

| Tissue    | Amodiaquine (μM) | Desethylamodiaquine (μM) |
|-----------|------------------|--------------------------|
| Lung      | 69.1 ±46.6       | 31.5 ±16.8               |
| Kidney    | 20.6 ±8.4        | 14.2 ±4.9                |
| Intestine | 10.6 ±1.2        | 5.4 ±0.8                 |
| Heart     | 4.4 ±0.7         | 2.8 ±0.3                 |
| Plasma    | 0.5 ±0.05        | 0.7 ±0.1                 |

1103

1104

**Extended Data Fig. 9. PK profiles for amodiaquine and desethylamodiaquine in**

1105

**hamsters. (a)** Plasma concentration-time profiles showing mean concentration (± s.d.)

1106

of amodiaquine (left) and desethylamodiaquine (right) at different time points after a

1107

single subcutaneous injection of amodiaquine (50 mg/kg). **(b)** PK parameters for

1108

amodiaquine and desethylamodiaquine in plasma based on results shown in **(a)**. **(c)**

1109

Concentration of amodiaquine and desethylamodiaquine in tissues (lung, kidney,

1110

intestine, heart) and plasma 24 hours after subcutaneous dosing of 50 mg/kg

1111

amodiaquine.

1 **Supplementary Materials for**  
2 **Human organ chip-enabled pipeline to rapidly repurpose therapeutics**  
3 **during viral pandemics**

4 Longlong Si<sup>1#</sup>, Haiqing Bai<sup>1#</sup>, Melissa Rodas<sup>1</sup>, Wuji Cao<sup>1</sup>, Crystal Yuri Oh<sup>1</sup>, Amanda Jiang<sup>3</sup>,  
5 Rasmus Moller<sup>4</sup>, Daisy Hoagland<sup>4</sup>, Kohei Oishi<sup>4</sup>, Shu Horiuchi<sup>4</sup>, Skyler Uhl<sup>4</sup>, Daniel Blanco-  
6 Melo<sup>4</sup>, Randy A. Albrecht<sup>4,5</sup>, Wen-Chun Liu<sup>4,5</sup>, Tristan Jordan<sup>4</sup>, Benjamin E. Nilsson-Payant<sup>4</sup>,  
7 James Logue<sup>6</sup>, Robert Haupt<sup>6</sup>, Marisa McGrath<sup>6</sup>, Stuart Weston<sup>6</sup>, Atiq Nurani<sup>1</sup>, Seong Min Kim<sup>1</sup>,  
8 Danni Y. Zhu<sup>1</sup>, Kambez H. Benam<sup>1,+</sup>, Girija Goyal<sup>1</sup>, Sarah E. Gilpin<sup>1</sup>, Rachele Prantil-Baun<sup>1</sup>,  
9 Rani K. Powers<sup>1</sup>, Kenneth Carlson<sup>1</sup>, Matthew Frieman<sup>6</sup>, Benjamin R. tenOever<sup>4\*</sup>, and Donald E.  
10 Ingber<sup>1-3\*</sup>

11  
12 <sup>1</sup>Wyss Institute for Biologically Inspired Engineering, Harvard University, Boston, MA 02115,  
13 USA.

14 <sup>2</sup>Harvard John A. Paulson School of Engineering and Applied Sciences, Cambridge, MA 02139,  
15 USA.

16 <sup>3</sup>Vascular Biology Program and Department of Surgery, Boston Children's Hospital and Harvard  
17 Medical School, Boston, MA 02115, USA.

18 <sup>4</sup>Department of Microbiology, Icahn School of Medicine at Mount Sinai, New York, NY, USA.

19 <sup>5</sup>Global Health and Emerging Pathogens Institute, Icahn School of Medicine at Mount Sinai,  
20 New York, NY, USA.

21 <sup>6</sup>Department of Microbiology and Immunology, University of Maryland School of Medicine,  
22 Baltimore, MD 21201, USA

23 <sup>+</sup>Current address: Division of Pulmonary Sciences and Critical Care Medicine, Departments of  
24 Medicine & Bioengineering, U. of Colorado, Aurora, CO, USA.

25

26

27

28

29

30

31 **Supplementary Table 1. Limitations of current *in vitro* viral infection models<sup>10-12,24</sup>**

| <b>MODELS</b>                                          | <b>LIMITATIONS</b>                                                                                                                                                                                                                                                                                                                                                        |
|--------------------------------------------------------|---------------------------------------------------------------------------------------------------------------------------------------------------------------------------------------------------------------------------------------------------------------------------------------------------------------------------------------------------------------------------|
| <b>Cell lines<br/>(A549, MDCK)</b>                     | Minimal viral replication without the addition of exogenous proteases<br>Cannot be used for analysis of virus tropism<br>Lack host immune, tissue-level, or organ-level responses<br>Do not mimic the <i>in vivo</i> phenotype of human lung cells and tissues                                                                                                            |
| <b><i>Ex vivo</i> culture of<br/>human lung tissue</b> | Short viability (4-10 days)<br>Limited availability of resources and expensive<br>Uncontrolled region-to-region and donor-to-donor variation<br>Poor reproducibility of experimental results<br>Difficult to analyze mechanism of infection or host responses<br>Not possible to study viral evolution                                                                    |
| <b>Human organoids</b>                                 | Lack of physiologically relevant organ-level microenvironment<br>Difficult to access apical surface of the epithelium<br>Lack of air-liquid interface<br>Cannot study mucociliary clearance<br>Lacks endothelium and circulating immune cells<br>Absence of relevant mechanical cues (air flow, vascular flow)<br>Thick ECM gel complicates permeability and drug studies |

32

33

34

**Supplementary Table 2. Summary of antibodies used in this study**

| <b>Protein/Structure/Cell</b> | <b>Antibody</b>                                          | <b>Vendor and Catalog</b>               |
|-------------------------------|----------------------------------------------------------|-----------------------------------------|
| Tight junction                | Alexa Fluor 594 anti-ZO-1                                | Life Technologies, Cat# 339194          |
| Cilia                         | Alexa Fluor 647 anti-Acetyl- $\alpha$ -Tubulin           | Cell Signaling Technology, Cat#81502    |
| VE-Cadherin                   | FITC anti-human VE-cadherin                              | BD Biosciences, Cat# 560411             |
| Goblet cell                   | Anti-Mucin5AC                                            | Santa Cruz Biotechnology, Cat# sc-21701 |
| Club cell                     | Anti-human Uteroglobin/cc-10                             | R&D Systems, Cat# MAB4218SP             |
| Basal cell                    | Anti-Cytokeratin 5                                       | Sigma-Aldrich, Cat# SAB5300265          |
| Influenza NP                  | Anti-influenza NP                                        | Invitrogen, Cat# MA516291               |
| hACE2                         | Anti-hACE2 antibody                                      | Abcam, cat. #ab239924                   |
| ECM/Collagen                  | Anti-Collagen IV $\alpha$ 1                              | Novus Biologicals, Cat# NBP1-97716G     |
| Neutrophil                    | Alexa Fluor 594 anti-human CD45                          | Biolegend, Cat# 368520                  |
| Influenza HA1 (H1N1)          | Rabbit anti-influenza A H1N1 HA1 antibody                | Sino Biological, Cat# 11692-T62         |
| Influenza HA (H3N2)           | Mouse monoclonal [AT1B7] to Influenza A H3N2 HA antibody | Abcam, Cat# ab139361                    |
| TMPRSS2                       | Mouse anti-TMPRSS2 antibody                              | Novus Biologicals, Cat# H00007113-B01P  |
| TMPRSS4                       | Rabbit anti-TMPRSS4 antibody                             | Novus Biologicals, Cat# NBP1-56991      |
| TMPRSS11D                     | Mouse anti-TMPRSS11D antibody                            | Abnova, Cat# H00009407-B01              |
| TMPRSS11E                     | Rabbit anti-TMPRSS11E (DESC1) antibody                   | OriGene Technologies, Cat# TA350522     |
| Secondary antibody            | Goat anti-mouse IgG, Alexa Fluor 488/594/647             | Life Technologies                       |
|                               | Goat anti-rabbit IgG, Alexa Fluor 488/594/647            | Life Technologies                       |
|                               | Goat anti-rabbit IgG H&L (HRP)                           | Abcam                                   |
|                               | Goat anti-mouse IgG H&L (HRP)                            | Abcam                                   |

35

36



37 **Supplementary Table 3. Primer sequences used for RT-qPCR analysis in this study.**

| <b>Gene</b> | <b>Primer</b> | <b>Sequence (5'-3')</b>  |
|-------------|---------------|--------------------------|
| TMPRSS2     | Forward       | CTTTGAACTCAGGGTCACCA     |
|             | Reverse       | TAGTACTGAGCCGGATGCAC     |
| TMPRSS4     | Forward       | TGCTTCAGGAAACATACCGA     |
|             | Reverse       | CTGGAGTGAGCTCCTCATCA     |
| TMPRSS11D   | Forward       | TACACAGGAATACAGGACTT     |
|             | Reverse       | CTCACACCACTACCATCT       |
| DESC1       | Forward       | GTTGGTGGGACAGAAGTAGAAG   |
|             | Reverse       | TGTAGGGAACAGGGCTAGAA     |
| hACE2       | Forward       | CATTGGAGCAAGTGTTGGATCTT  |
|             | Reverse       | GAGCTAATGCATGCCATTCTCA   |
| Pol         | Forward       | TTTATTACAGGGACAGCAGAGATC |
|             | Reverse       | CTACTGCCCTTCACCTTTCC     |
| GAPDH       | Forward       | GAAGGTGAAGGTCGGAGTC      |
|             | Reverse       | GAAGATGGTGATGGGATTTCC    |

38

39

40 **Other Supplementary Materials for this manuscript:**

41 **Movie S1 (.mp4 format). Time-lapse video recording showing infection of the**  
42 **human Airway Chip by GFP-labeled influenza PR8 (H1N1) virus recorded over 36 hours.**

43 The human Airway Chip was inoculated with GFP-labeled PR8 virus (MOI = 0.01) and cultured  
44 for 36 h (images were recorded every 15 min). Virus infection is indicated by the progressive  
45 increase in GFP-positive cells (movies are played at 18,000 times real time). **(a)** GFP signal,  
46 **(b)** merge of GFP and bright field.

47 **Movie S2 (.mp4 format). Real-time imaging showing recruitment of human**  
48 **neutrophils to endothelium under flow in the human Airway Chip infected with influenza**

49 **virus. (a)** The movie shows fluorescently-labelled human neutrophils flowing over a quiescent  
50 endothelium within the control Airway Chip that contains an airway epithelium on the opposite  
51 side of the porous membrane from the endothelium. Note that the neutrophils flow by and do not  
52 stick to the inactivated endothelium under these control conditions, as observed in normal  
53 vessels *in vivo*. **(b)** In contrast, many of the flowing neutrophils adhere to the surface of the  
54 activated endothelium within an Airway Chip that has been infected with influenza H1N1 virus  
55 (MOI = 0.1) via its introduction into the upper air channel, much as they do at sites of  
56 inflammation *in vivo*. The movies are played at 25 times real time.

57
